# Supplementary material
Source: PubMed Central journal article supplement (PMC8563380)
Supplement: NIHMS1722947-supplement-1.pdf [file NIHMS1722947-supplement-1.pdf]

## Supplementary Data

This appendix has been provided by the authors to give readers additional information about their work

### Efficacy, Safety and Biomarker Analysis of Combined PD-L1 (Atezolizumab) and VEGF (Bevacizumab) Blockade in Advanced Malignant Peritoneal Mesothelioma

#### Table of Contents

|                                                                                                                                                                                                                            |    |
|----------------------------------------------------------------------------------------------------------------------------------------------------------------------------------------------------------------------------|----|
| 1. Supplementary methods 1 .....                                                                                                                                                                                           | 3  |
| 2. Supplementary methods 2 .....                                                                                                                                                                                           | 4  |
| 3. Figure S1. Comparison of prospective trials in malignant peritoneal (MPeM) and pleural mesothelioma (MPM).....                                                                                                          | 9  |
| 4. Figure S2. Antitumor activity by key clinicopathological subgroups of malignant peritoneal mesothelioma (MPeM).....                                                                                                     | 10 |
| 5. Figure S2 (cont.). Antitumor activity by key clinicopathological subgroups of malignant peritoneal mesothelioma (MPeM). .....                                                                                           | 11 |
| 6. Figure S3. Effect of atezolizumab and bevacizumab (AtezoBev) in patients with malignant peritoneal mesothelioma (MPeM). .....                                                                                           | 12 |
| 7. Figure S4. Comparison of duration of treatment on atezolizumab and bevacizumab (AtezoBev) on-study with time to next treatment for platinum-pemetrexed based chemotherapy prior to study enrollment.....                | 13 |
| 8. Figure S5. Comparison of pre-study treatment outcomes (along with historical data) with on-study treatment outcomes for 20 patients with malignant peritoneal mesothelioma.....                                         | 14 |
| 9. Figure S6. Tumor mutation burden (TMB) of patients with malignant peritoneal mesothelioma on current study relative to other tumors as derived from The Cancer Genome Atlas Database (TCGA).....                        | 15 |
| 10. Figure S7. Comparison of 20 Most Common Genomic Alterations in Malignant Peritoneal Mesothelioma (MPeM) Reported in Literature Among Responders and Non-Responders on Trial.....                                       | 16 |
| 11. Figure S8. Detailed Gene Signature Scores in Pre-treatment Tumor Tissue Between Responders (Patients with Partial Response [PR]) and Non-responders (Patients with Stable Disease [SD]). .....                         | 17 |
| 12. Figure S9. Association between Gene Signature Scores in Pre-treatment Tumor Tissue and Response Status (Responder (Patients with Partial Response [PR]) vs. Non-responders (Patients with Stable Disease [SD])). ..... | 18 |
| 13. Figure S10. Association between change in gene signature scores between baseline and on-treatment samples and response to therapy with atezolizumab and bevacizumab. ....                                              | 19 |

|     |                                                                                                                                                                                                                                      |    |
|-----|--------------------------------------------------------------------------------------------------------------------------------------------------------------------------------------------------------------------------------------|----|
| 14. | <b>Figure S11. Ratio of density of immune-effector cells and immune-supressor cells its association with response on atezolizumab and bevacizumab on study.</b>                                                                      | 21 |
| 15. | <b>Figure S12. Association between epithelial-mesenchymal transition (EMT) gene score and progression-free survival (PFS) in study cohort.</b>                                                                                       | 22 |
| 16. | <b>Figure S13. Association between epithelial-mesenchymal transition (EMT) gene signature score used in our study and EMT signature derived from published studies in malignant pleural mesothelioma (MPM) and response. (14,19)</b> | 23 |
| 17. | <b>Figure S14. Association between response and prognostic transcriptomic profiles published for malignant pleural mesothelioma (MPM).(20)</b>                                                                                       | 24 |
| 18. | <b>Table S1. Key trials showcasing activity of immune checkpoint and VEGF inhibition in malignant mesothelioma.</b>                                                                                                                  | 25 |
| 19. | <b>Table S2. Secondary endpoints per immune-modified Response Evaluation Criteria in Solid Tumors (imRECIST) by independent review.(31)</b>                                                                                          | 26 |
| 20. | <b>Table S3. Treatment-related adverse events (TRAEs)</b>                                                                                                                                                                            | 27 |
| 21. | <b>Table S4. Key trials comparing activity of atezolizumab and bevacizumab (AtezoBev) in current trial to that of available treatment options for patients with malignant (peritoneal) mesothelioma.</b>                             | 29 |
| 22. | <b>References</b>                                                                                                                                                                                                                    | 31 |

## 1. Supplementary methods 1

Following methodology was used for collecting and analyzing the real-world evidence for treatment of patients with malignant peritoneal mesothelioma (MPeM) off-current trial for comparison with outcomes on the current trial of atezolizumab and bevacizumab (AtezoBev) in MPeM:

### **Clinical course of trial patients on pre-study platinum-pemetrexed chemotherapy (N = 20)**

To address any concerns of selection bias pertaining to indolent tumor biology of trial patients that may confound objective response rate (ORR) and progression-free survival (PFS), we evaluated patient and population dynamics of the study cohort prior to study enrollment. We looked at the pre-enrollment treatment data on patients with MPeM who were enrolled on the current study and received AtezoBev. Since platinum-pemetrexed is the standard of care for patients with MPeM and prior treatment was an eligibility criterion for study enrollment, all 20 patients received this chemotherapy. Data on treatment course on platinum-pemetrexed chemotherapy prior to study enrollment was collected using electronic medical records (source data). Tumor response was categorized as either disease regression, stability or progression as per radiology report and treating physician assessment. Time to next treatment was defined as the time interval between date of treatment initiation and date of commencement of next line of therapy as per treating physician discretion (progression of disease – 17 [85%] and poor tolerability – 3 [15%]). In case of use of maintenance pemetrexed after initial platinum-pemetrexed course, the duration of pemetrexed as well as reintroduction of platinum was included in this interval including duration of treatment breaks. We compared this time to next treatment on standard of care first-line platinum-pemetrexed chemotherapy for all 20 study patients prior to enrollment to AtezoBev to their duration of treatment on AtezoBev on trial.

## 2. Supplementary methods 2

### A. Sample collection and processing

Fresh core needle biopsies (CNBs) or excisional biopsies were obtained with the purpose of research studies before and after treatment (Cycle 2 Day 1) and sent to the MD Anderson Institutional Tissue Bank (ITB) immediately after collection. At least 5 tissue cores were attempted from the CNB/surgical procedure based on patient's clinical condition at the time of biopsy and determined by the radiologist performing the procedure. These cores/surgical excision pieces were processed as follows.

Figure A1. Prioritization of biomarker analyses

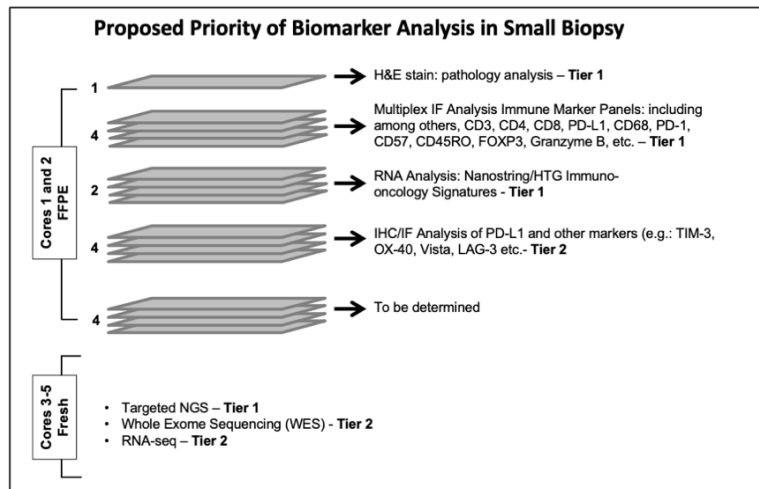

### B. Histology evaluation and quality control

Hematoxylin and Eosin (H&E) stained sections from CNBs and surgical excisions were used to confirm the presence of tumor cells, as well as their abundance (tumor cellularity), stromal components and lymphocytic infiltrates. H&E-stained sections from all FFPE diagnostic slides (tumor, normal and lymph nodes) were scanned in Aperio™ digital pathology scanner analysis for pathological evaluation and selection of 1 or 2 blocks (depending on tumor availability) for biomarker analysis. All tissue specimens collected were reviewed by reference pathologists at a central laboratory. At least, three types of QC activities for specimens collected were performed: a) histology/cytology examination of the tissues and cells, b) tissue quality assessment of fresh specimens for extraction of DNA, RNA and proteins, and to prepare histology specimens such as whole sections for immunohistochemistry and immunofluorescence and c) quality assessment of DNA, RNA and protein extracted. Blood (plasma and PMBCs), tumor (CNB and surgical excision specimens) samples will be subjected to DNA, RNA and protein extraction using standard methods. DNA and RNA quantity and integrity was assessed using NanoDrop 1000 spectrophotometer (Nanodrop technologies) and Pico-green analyses.

### C. Immunohistochemistry (IHC) analyses

IHC stains for microsatellite instability (MSI) status were done with specific antibody staining of treated formalin-fixed, paraffin embedded (FFPE) tissue samples. Briefly, 5- $\mu$ m sections were baked in oven for 30 minutes and loaded into the Leica Bond III automated system (Leica Microsystems, Buffalo Grove, Illinois), as per manufacturer's protocol. Samples were challenged with specific antibodies to the proteins of interest (Table A1). Prior to secondary antibody challenge blocking, the samples were bathed in blocking serum. Secondary biotin-conjugated antibodies were then added. The stain was visualized using 3,3'-diaminobenzidine and hematoxylin counterstain. Appropriate positive-negative controls were performed simultaneously. Staining was evaluated by pathologists with expertise in IHC and MSI assessment who were blinded to clinical data. Results were reported as either MSI-Low (MSS) if there was intact nuclear expression evident for all four proteins in carcinoma cells or MSI-High (MSI-H) if expression was lost in any of the proteins in the carcinoma cells.

IHC stain for PD-L1 status was done using specific antibody staining of FFPE tissue samples (Table C1). Briefly, 4- $\mu$ m sections were baked in the oven for 12 minutes and loaded into Leica Bond Max autostainer (Leica Biosystems, Vista, CA), as per manufacturer's protocol. Samples were then challenged with specific antibodies to the proteins of interest (Table A1). The stain was visualized using hematoxylin II counterstain. Appropriate positive-negative controls were performed simultaneously. Staining was evaluated by pathologists with expertise in IHC and PD-L1 assessment and blinded to clinical data. Staining was reported as proportion of tumor cells with PD-L1 staining (discernible membrane staining of any intensity), estimated as the percentage of PD-L1 positive tumor cells over the total tumor cells.

Table C1. List of antibodies for MSI and PD-L1

| Antibody | Clone    | Dilution | Epitope Retrieval                | Source                                       |
|----------|----------|----------|----------------------------------|----------------------------------------------|
| MLH1     | G168-728 | 1:300    | Tris-EDTA Buffer, 10 min         | Cell Marque, Rocklin, CA, USA                |
| MSH2     | FE11     | 1:100    | Tris-EDTA Buffer, 20 min         | Calbiochem, San Diego, CA, USA               |
| MSH6     | 44       | 1:300    | Citrate Buffer, 20 min           | BD Biosciences, San Diego, CA, USA           |
| PMS2     | A16-4    | 1:125    | Tris-EDTA Buffer, 20 min         | BD Biosciences, San Diego, CA, USA           |
| PD-L1    | SP263    | 1:75     | Tris-HCl with 1% carrier protein | Ventana Medical Systems Inc, Tucson, AZ, USA |

### D. Whole-exome sequencing (WES) data processing

Raw output of the Illumina exome sequencing data was processed using Illumina's Consensus Assessment of Sequence And Variation (CASAVA) tool (v1.8.2) ([http://support.illumina.com/sequencing/sequencing\\_software/casava.html](http://support.illumina.com/sequencing/sequencing_software/casava.html)) for demultiplexing and conversion to FASTQ format. The FASTQ files were aligned to the human reference genome (hg19) using BWA (v0.7.5) allowing up to 3 mismatches (2 mismatches must be in the first 40 seed regions) for a 76-base sequencing run.(1) The aligned BAM files were then subjected to mark duplication, realignment and base recalibration using Picard (v1.112) and GATK (v3.3.1) software tools.(2) The generated BAM files were then used for downstream analysis. Genotyping quality check was performed to rule out any possible sample swapping or contamination. Briefly, germline SNPs were called using Platypus (v0.5.2).(3) Samples from the same patient were confirmed/identified by percentage of genotyping-identity between them, which was

defined by the fraction of identical germline alleles among the overlapping SNPs between the two samples. All samples in this study passed quality check. No sample swapping or contamination was detected.

### **E. Somatic mutation calling and filtering**

MuTect (v1.1.4) was applied to identify somatic point mutations and Pindel (v0.2.4) was applied to identify small insertion and deletions (Indels).(4,5) The MuTect and Pindel outputs were then processed using the Cancer Genomics Lab (MD Anderson Cancer Center) for filtering and annotation. Briefly, only MuTect calls marked as “KEEP” were selected and taken into the next step. For both substitutions and Indels, mutations with a low variant allelic fraction (VAF < 0.02) or had a low total read coverage (< 20 reads for tumor samples; <10 reads for matching normal sample), were removed. In addition, Indels that had an immediate repeat region within 25 base pairs downstream towards its 3’ region were also removed. Common variants reported by the ExAc (the Exome Aggregation Consortium, <http://exac.broadinstitute.org>), Phase-3 1000 Genome Project ([http://phase3browser.1000genomes.org/Homo\\_sapiens/Info/Index](http://phase3browser.1000genomes.org/Homo_sapiens/Info/Index)), or the NHLBI GO Exome Sequencing Project (ESP6500, <http://evs.gs.washington.edu/EVS/>) with a population minor allele frequency greater than 1% were removed. For the tumor mutational burden (TMB) calculation, only variants with an annotation of "Frame\_Shift\_Del", "Frame\_Shift\_Ins", "In\_Frame\_Del", "In\_Frame\_Ins", "Missense\_Mutation", "Nonsense\_Mutation", "Silent", "Splice\_Site", "Translation\_Start\_Site" and "Nonstop\_Mutation" were kept for the analysis.

### **F. RNA sequencing and data analysis**

FASTQ files of RNA samples are processed using both STAR aligner (v2.6.0) following the two-step alignment procedure and TopHat (v2.1.0) and Cufflinks (v2.2.1).(6-8) Read counts were obtained using HTSeq (v0.11.0).(9) Transcripts without read counts were removed before normalization and differential expression analysis performed using R package DESeq2 (v1.28.1).(10) Expression levels were considered significantly different between two groups when genes with log2 fold change greater than 1 and q value (false discovery rate or FDR) < 0.05. Normalized counts were transformed using the variance-stabilizing transformation (VST) module in DESeq2 for downstream analyses. The heatmaps were generated using R package pheatmap (v1.0.12) on VST-transformed counts. Of note, only 2 of the 20 patients had biopsies from extra-peritoneal sites (abdominal wall lesions). Due to the limited number of these patients, gene differential analysis performed on RNA sequencing data did not take into account the site of biopsy (peritoneal vs. extraperitoneal).

### **G. Gene signature score**

Normalized gene signature enrichment scores were calculated using in R package GSVA (v1.36.1) with default parameters.(11) Gene signatures score with association to following disease biology were calculated as per Table G1.

*Table G1. List of gene expression signatures scores used for correlative analyses*

| Score | McDermott et al.(12)<br>Nature medicine, 2018 | Franzini et al.(13)<br>Clinical Cancer Research<br>2020 | Thompson et al.(14)<br>Lung cancer, 2020 |
|-------|-----------------------------------------------|---------------------------------------------------------|------------------------------------------|
|-------|-----------------------------------------------|---------------------------------------------------------|------------------------------------------|

| <b>Tumor Biology</b> | <b>Immune-Sensitivity</b> |              | <b>Angiogenesis</b> | <b>Epithelial Mesenchymal Transition</b> |             |
|----------------------|---------------------------|--------------|---------------------|------------------------------------------|-------------|
| <b>Genes</b>         | <i>CD8A</i>               | <i>CD274</i> | <i>VEGFA</i>        | <i>CDH1</i>                              | <i>MMP2</i> |
|                      | <i>CD27</i>               | <i>CTLA4</i> | <i>KDR</i>          | <i>CDH3</i>                              | <i>AGER</i> |
|                      | <i>IFNG</i>               | <i>FOXP3</i> | <i>ESM1</i>         | <i>CLDN4</i>                             |             |
|                      | <i>GZMA</i>               | <i>TIGIT</i> | <i>PECAM1</i>       | <i>EPCAM</i>                             |             |
|                      | <i>GZMB</i>               | <i>IDO1</i>  | <i>ANGPTL4</i>      | <i>ST14</i>                              |             |
|                      | <i>PRF1</i>               | <i>PSMB8</i> | <i>CD34</i>         | <i>MAL2</i>                              |             |
|                      | <i>EOMES</i>              | <i>PSMB9</i> |                     | <i>VIM</i>                               |             |
|                      | <i>CXCL9</i>              | <i>TAP1</i>  |                     | <i>SNAI2</i>                             |             |
|                      | <i>CXCL10</i>             | <i>TAP2</i>  |                     | <i>ZEB2</i>                              |             |
|                      | <i>CXCL11</i>             |              |                     | <i>FN1</i>                               |             |

#### **H. Vectra Analysis**

Analysis of FFPE samples was done using an antibody panel to characterize the expression of cancer cells and subsets of tumor associated immune cells: pancytokeratin (AE1/AE3), CK7, DAPI and 7 immune markers distributed in 2 panels PD-1, PD-L1, CD3, CD8, CD68, FOXP3 and CD45RO. For multiplex immunofluorescence (IF) analysis, we used the Opal chemistry and multispectral microscopy Vectra system (Perkin-Elmer) which includes the Nuance software. Analysis was performed using the InForm software. The expression of protein markers and inflammatory cells was examined using an infiltrate density score established by the number of cells expressing a determined marker by tissue area. Simultaneous marker expression was quantified using the Vectra 3.0™ multispectral microscopy and image analysis InForm™ 2.2.1 software (PerkinElmer). Mutually exclusive combinations of markers on a per cell basis were created from the InForm cell segmentation files. Normalized counts, nearest neighbor relationships, and concentrations of markers on a bivariate basis were analyzed and visualized using the Foundry (Syntropy) platform.

#### **I. Clinical methods**

- Eligible patients were ≥18 years old, had histologically confirmed advanced MPeM not amenable to definitive CRS (according to peritoneal-multidisciplinary tumor board) and had received at least one line of systemic chemotherapy involving platinum-pemetrexed doublet. Patient were required to have either progression on prior platinum-pemetrexed chemotherapy or adverse-events that precluded treatment (hypersensitivity to platinum, poor patient tolerance, worsening renal functions despite dose adjustment). Patients were required to have measurable disease according to Response Evaluation Criteria in Solid Tumors-version1.1 (RECISTv1.1), an Eastern Cooperative Oncology Group performance status (ECOG PS) of 0 or 1 and normal organ/bone marrow function. Extraperitoneal metastases including pleural and lung metastases were allowed. Full eligibility criteria are provided in study protocol (Supplementary-Protocol).

- All pathological diagnosis of mesothelioma was confirmed at MD Anderson by reference pathologists with high level of expertise in diagnosis of pleural and peritoneal mesotheliomas.
- History of prior asbestos exposure was ascertained using patient reported occupational/exposure history assessment by treating provider documented in electronic medical records.
- Prior bevacizumab was allowed. The rationale for this was that although first-line anti-PD1 is not a standard of care for patients with peritoneal mesothelioma, bevacizumab may sometimes be used with chemotherapy based on the results of MAPS study in pleural mesothelioma.(15) However this is not a universal practice since no patients with peritoneal mesothelioma were included in the MAPS study. Since the rationale for the study was based on the ability of bevacizumab to modulate (ameliorate) a VEGF induced immunosuppressive tumor microenvironment, it was not felt that prior bevacizumab would alter response to the combination adversely. On the other hand, escape mechanisms to prior immunotherapies (IOs) may be related to mechanisms, not targeted by the combination.
- Key exclusion criteria were any prior immunotherapy, diagnosis of active autoimmune disease or immunodeficiency, concurrent malignancy, any known history of active/untreated central nervous system metastases and ongoing systemic immunosuppressive therapy at time of enrollment.

#### ***J. Study oversight***

The principal investigators, in collaboration with a Joint Steering Committee (JSC) (comprising of members from MD Anderson Cancer Center and F. Hoffmann–La Roche/Genentech), developed the protocol and were responsible for study oversight. The protocol and all amendments were approved by the University of Texas M.D. Anderson Institutional Review Board (IRB). The study was conducted in accordance with Declaration of Helsinki and International Conference on Harmonization Good Clinical Practice guidelines. Patients provided written informed consent before study enrollment. All authors were involved in data analysis and manuscript preparation and vouch for the integrity and completeness of the data reported and adherence to study protocol. Study is registered in ClinicalTrials.gov (NCT03074513). Full protocol is provided (Supplementary-Protocol).

#### ***K. Data sharing***

Study protocol and statistical analysis plan are provided as supplementary material to the manuscript. Other de-identified participant data and applicable supporting clinical trial documents (including data dictionary) may be available upon reasonable request. All information requests should be sent to the corresponding author, Dr. Kanwal Raghav (kpraghav@mdanderson.org). Where clinical trial data are provided, MD Anderson Cancer Center will protect the privacy of our clinical trial participants.



### 3. Figure S1. Comparison of prospective trials in malignant peritoneal (MPeM) and pleural mesothelioma (MPM).

We systematically reviewed published prospective clinical trials for malignant mesothelioma (MM) between Oct 2002 (when the New Drug Application for pemetrexed, the only approved drug for mesothelioma, was submitted to U.S. Food and Drug Administration) and Nov 2019 (when first analysis of data on current study was performed), using PubMed.(16) Search terms included “Peritoneal Mesothelioma”, “Pleural Mesothelioma” or “Mesothelioma” [Title]. Searched studies were reviewed and those involving systemic therapy for metastatic disease were included. Trials involving surgery, neoadjuvant or adjuvant chemotherapy were excluded. Study characteristics and patient distribution with regards to MPeM and MPM were obtained from original reports. Studies were classified as those done exclusively for MPeM, MPM and those that allowed both mesothelioma (MM) patients. The 95% confidence interval (95%CI) was calculated using Clopper and Pearson method. Proportions of patients on trials was compared to proportion of annual MPeM vs. MPM incidence in the United States (US) using Fisher’s-exact test.(17) **Compared to MPM, MPeM had very few published trials (Panel a). Likewise, the proportion of MPeM patients enrolled on all trials and trials that allowed both MM patients was significantly lower than the burden of disease arguing for dedicated trials in this space (Panel b).**

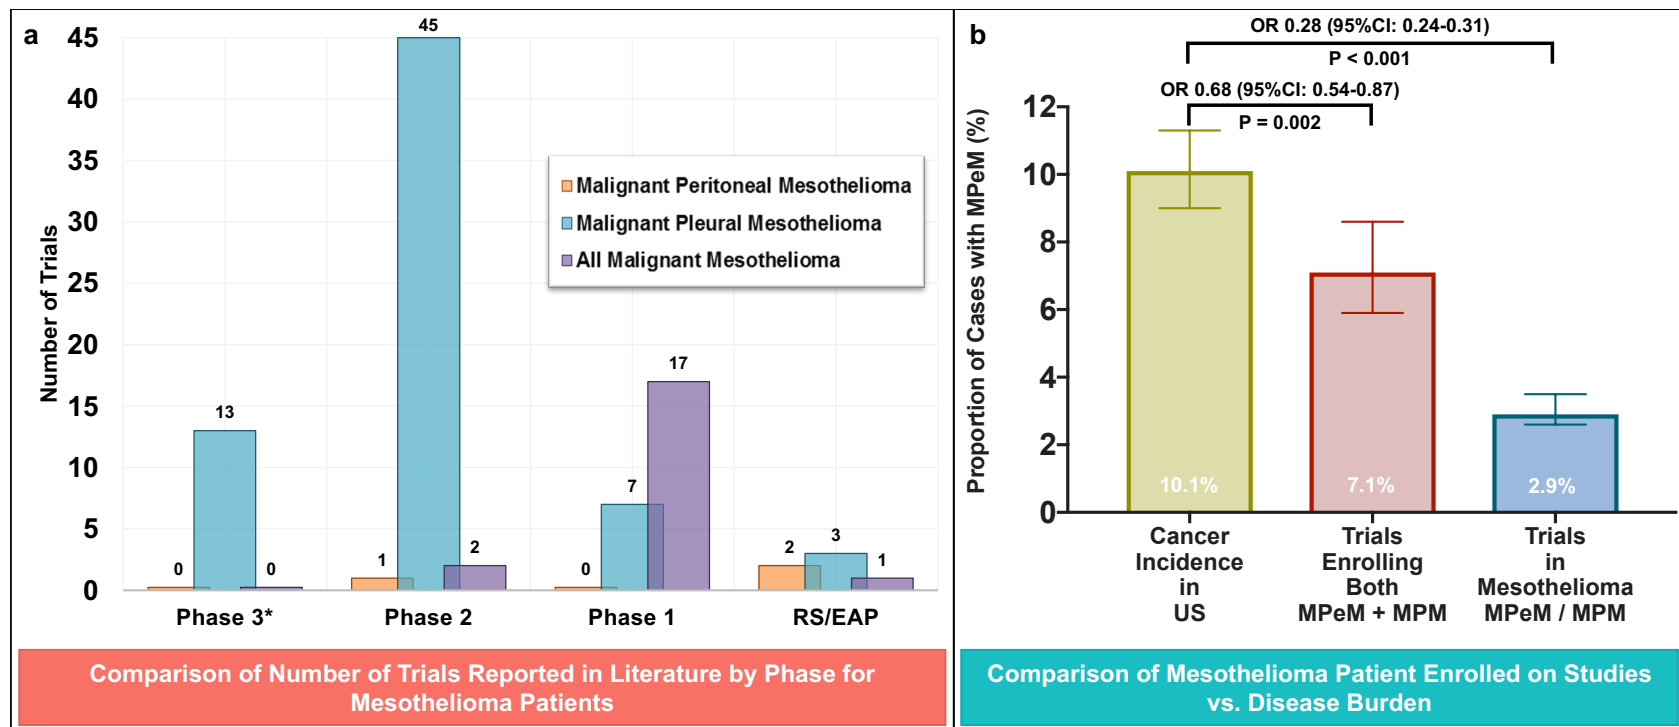

**Abbreviations:** RS/EAP, registry study/expanded access program; OR, odds ratio

#### 4. Figure S2. Antitumor activity by key clinicopathological subgroups of malignant peritoneal mesothelioma (MPeM).

Forest-plot of post-hoc sub-group analysis of confirmed objective response rate (ORR<sup>C</sup>) defined as proportion of patients who had Response Evaluation Criteria in Solid Tumors - version 1.1 partial response (PR) based on key characteristics with clinical impact in patients with MPeM. **Similar efficacy was seen in all subgroups.** Responses were seen more frequently in younger patients, women and those with Eastern Cooperative Oncology Group – performance status (ECOG PS) 0.

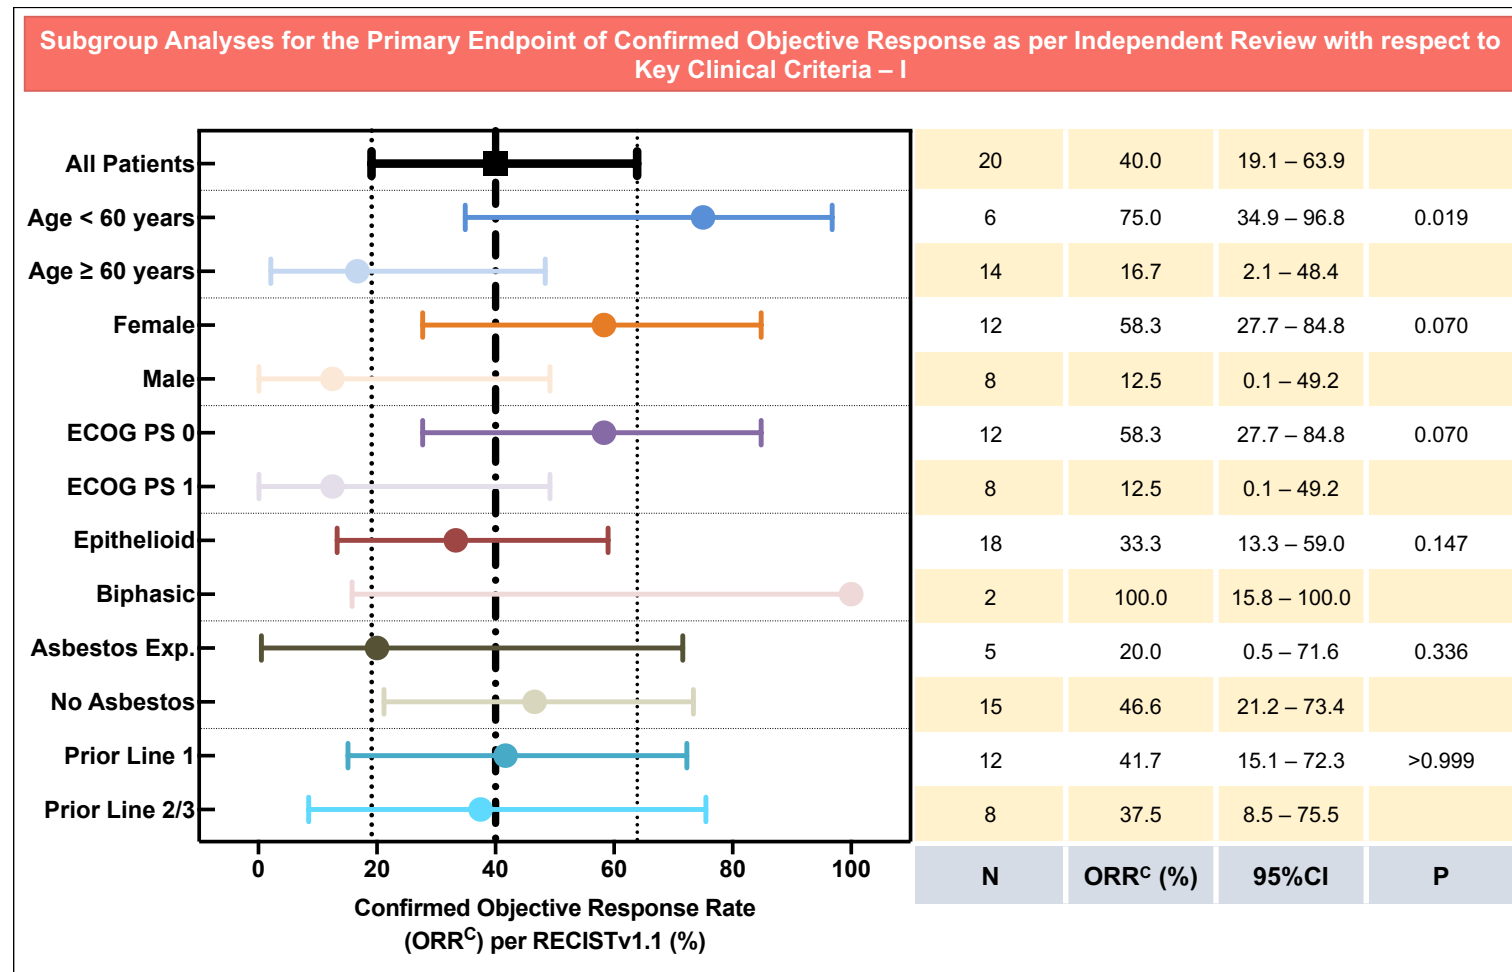

**Abbreviations:** 95%CI, 95% confidence interval; Exp., exposure

5. **Figure S2 (cont.). Antitumor activity by key clinicopathological subgroups of malignant peritoneal mesothelioma (MPeM).**

Forest-plot of post-hoc sub-group analysis of confirmed objective response rate (ORR<sup>C</sup>) defined as proportion of patients who had Response Evaluation Criteria in Solid Tumors - version 1.1 partial response (PR) based on key characteristics with clinical impact in patients with MPeM. **Similar efficacy was seen in all subgroups.** Tumor burden was measured using sum of target lesions as per RECIST v1.1.

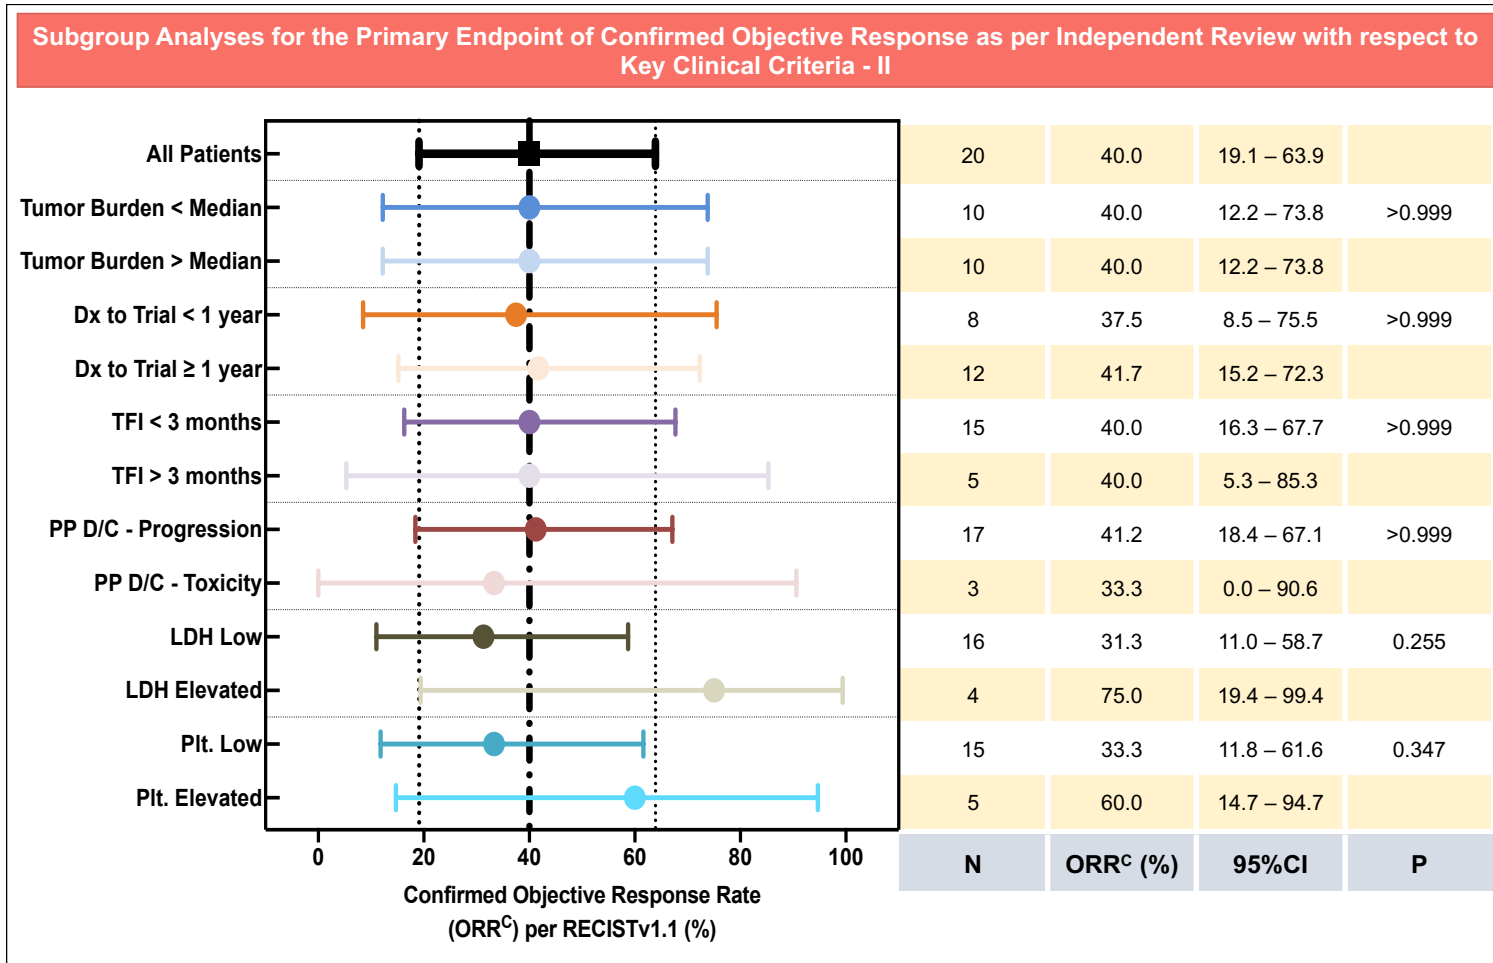

**Abbreviations:** 95%CI, 95% confidence interval; Dx, diagnosis; LDH, lactate dehydrogenase; Plt., platelet; PP D/C; reason for discontinuation of prior platinum-pemetrexed chemotherapy TFI, treatment free interval (interval between last chemotherapy and start of trial therapy)

6. **Figure S3. Effect of atezolizumab and bevacizumab (AtezoBev) in patients with malignant peritoneal mesothelioma (MPeM).**

**Panel a** show a rapid response with decrease in malignant ascites and peritoneal nodule after 3 cycles of AtezoBev. **Panel b** shows a patient with extensive omental carcinomatosis with a long durable response after nearly 2 years of therapy. These cases highlight the prevalence of non-measurable peritoneal disease in MPeM and the robust responses seen with AtezoBev, the extent of which cannot be captured completely with Response Evaluation Criteria in Solid Tumors (RECIST), version 1.1. **Panel c** illustrates a dramatic metabolic and morphological response seen with AtezoBev in a patient with biphasic mesothelioma (epithelioid and sarcomatoid components). These patients have disease resistant to conventional standard of care cytotoxic chemotherapy (this patient was treated with platinum-pemetrexed chemotherapy prior to study and progressed after 3 cycles at first restaging). **Panel d** shows a young patient with lymph node predominant peritoneal mesothelioma with a significant response on AtezoBev. All these patients had disease that was deemed as refractory to prior platinum-pemetrexed regimen and continue to be on AtezoBev at the time of data cutoff with durable duration of response (range: 12 – 20 months).

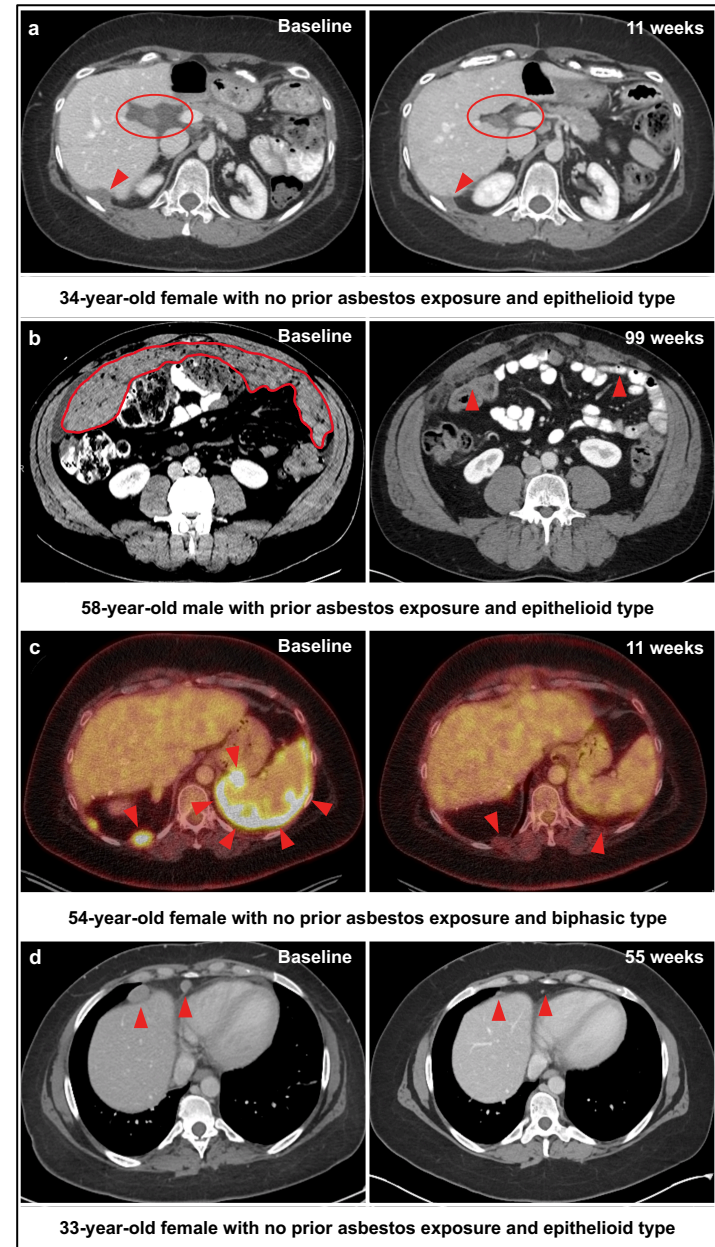

**7. Figure S4. Comparison of duration of treatment on atezolizumab and bevacizumab (AtezoBev) on-study with time to next treatment for platinum-pemetrexed based chemotherapy prior to study enrollment.**

Among 20 patients with malignant peritoneal mesothelioma enrolled on the current study and treated with AtezoBev, time to next treatment (defined as interval from date of initiation of treatment to date of commencement of next line of therapy as per treating physician discretion [obtained from electronic medical records]) on platinum-pemetrexed chemotherapy received as standard of care in comparison to duration of treatment (defined from date of treatment start to discontinuation as per protocol) on AtezoBev. For this real-world evidence, patient-level data was gathered from electronic health records. Vertical dashed lines represent median (black) and 95% confidence intervals (95%CI) (grey) duration. Tumor response (best overall response) on AtezoBev is reported as either partial response, stable disease or progressive disease as per Response Evaluation Criteria in Solid Tumors - version 1.1 by independent radiology review. Tumor response on platinum-pemetrexed chemotherapy prior to study enrollment is reported as either disease regression, stability or progression as per radiology reports and treating physician assessment (obtained from electronic medical records). Asterisk (\*) represents patients where treatment was stopped due to toxicity and not due to progressive disease. Patients were censored if treatment was discontinued for any reason other than disease progression.

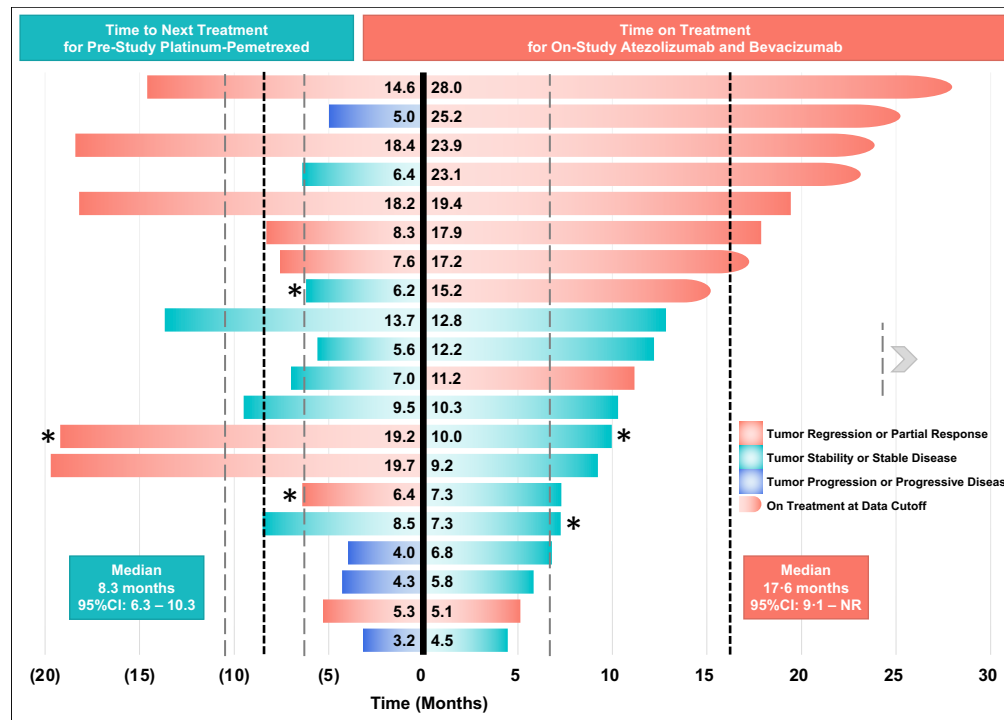

8. **Figure S5. Comparison of pre-study treatment outcomes (along with historical data) with on-study treatment outcomes for 20 patients with malignant peritoneal mesothelioma.**

For the 20 patients who enrolled on study and treated with atezolizumab and bevacizumab (AtezoBev), the median duration of treatment with AtezoBev (17.6 months; 95%CI: 9.1 – not reached [NR]) was longer than the time to next treatment for these patients on the prior platinum-pemetrexed chemotherapy (8.3 months; 95%CI: 6.3 – 10.3). At end of 1 year, only 30% patients had continued to be on prior chemotherapy compared to 61% of these patients when they were treated with AtezoBev. Furthermore, **prolonged responses occurred on AtezoBev in patient who had both long (green box) and short (orange box) time to next treatment to prior chemotherapy and there was no strong correlation between the two durations** (spearman  $r = 0.40$ ,  $P = 0.08$ ). Historical data was taken for chemo-naïve patients on the expanded access program (EAP) for pemetrexed who were treated with platinum-pemetrexed chemotherapy. **The response rate on this historical cohort of EAP population was comparable to our trial patient cohort on similar chemotherapy regimen.**(18)

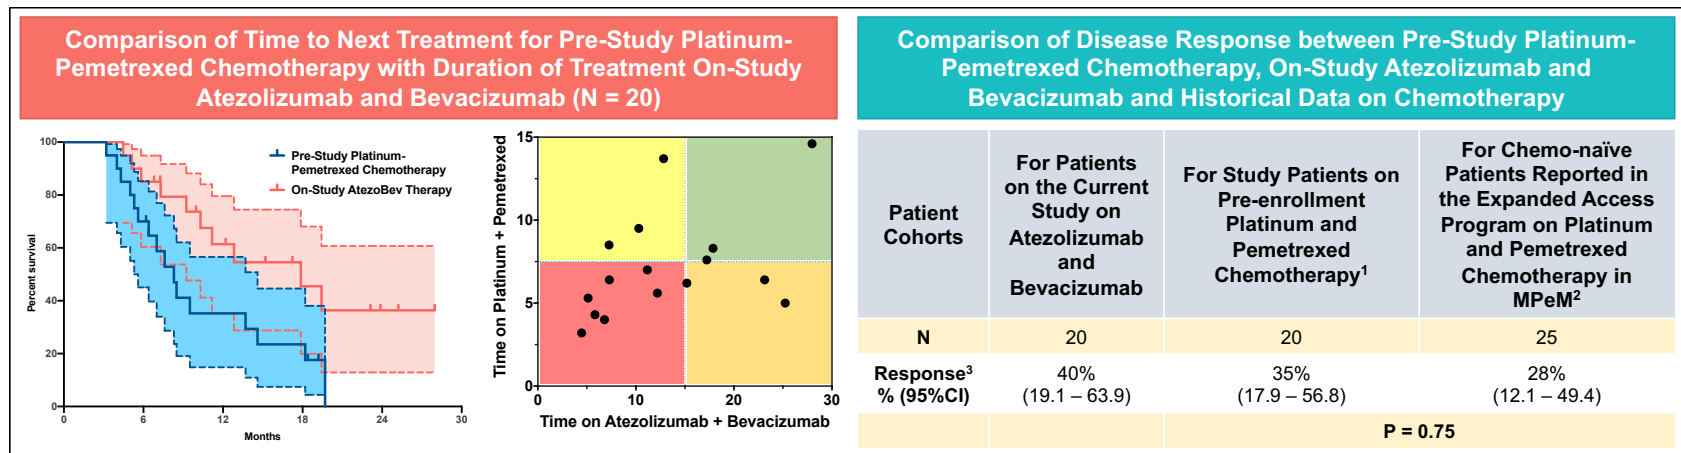

1. Tumor response on platinum-pemetrexed chemotherapy prior to study enrollment is reported as either disease regression, stability or progression as per radiology reports and treating physician assessment (obtained from electronic medical records).
2. Response data was reported for the subset of patients with malignant peritoneal mesothelioma (25 of 98) who were chemo naïve.

9. Figure S6. Tumor mutation burden (TMB) of patients with malignant peritoneal mesothelioma on current study relative to other tumors as derived from The Cancer Genome Atlas Database (TCGA).

TMB was calculated as mutations per megabase (MB) for our cohort as per supplementary methods 1 and obtained from TCGA for other tumor types. **TMB for our study cohort of malignant peritoneal mesothelioma was low with a median TMB of 0.8 mutations/megabase.** Compared to patients with malignant pleural mesothelioma, TMB appears to be slightly higher.

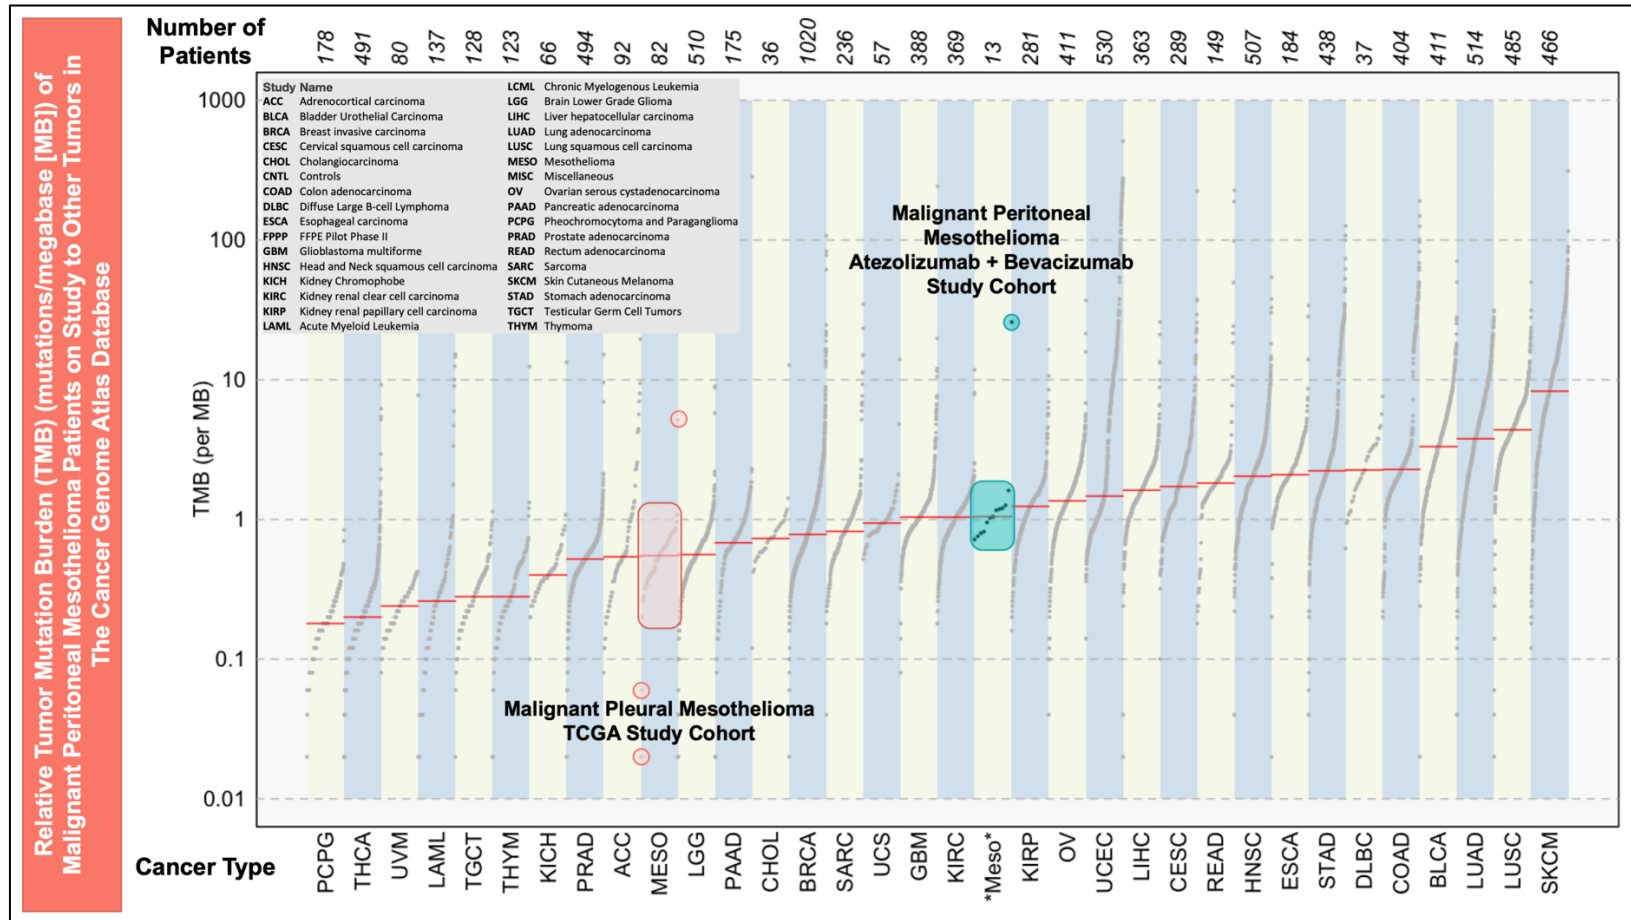

**10. Figure S7. Comparison of 20 Most Common Genomic Alterations in Malignant Peritoneal Mesothelioma (MPeM) Reported in Literature Among Responders and Non-Responders on Trial**

Oncoplot shows 20 most common genes altered (mutations and copy number variations) in patients with MPeM reported in literature. Each column represents a patient. Patients are arranged in order of best percentage change (response) in tumor measurements from baseline (from left to right: increase to decrease) as per RECISTv1.1 (Response Evaluation Criteria in Solid Tumors - version 1.1). The color bar at bottom shows response for each patient (PR [responder] and SD [non-responder with stable disease]). Each row represents a gene. The barplot on top shows the number of mutations (log) for each patient and the barplot on right has the frequency of mutations in all patients in each gene. Colors in the heatmap indicates distinct types of alterations as per key. **No specific genomic alterations appeared to be associated with response.**

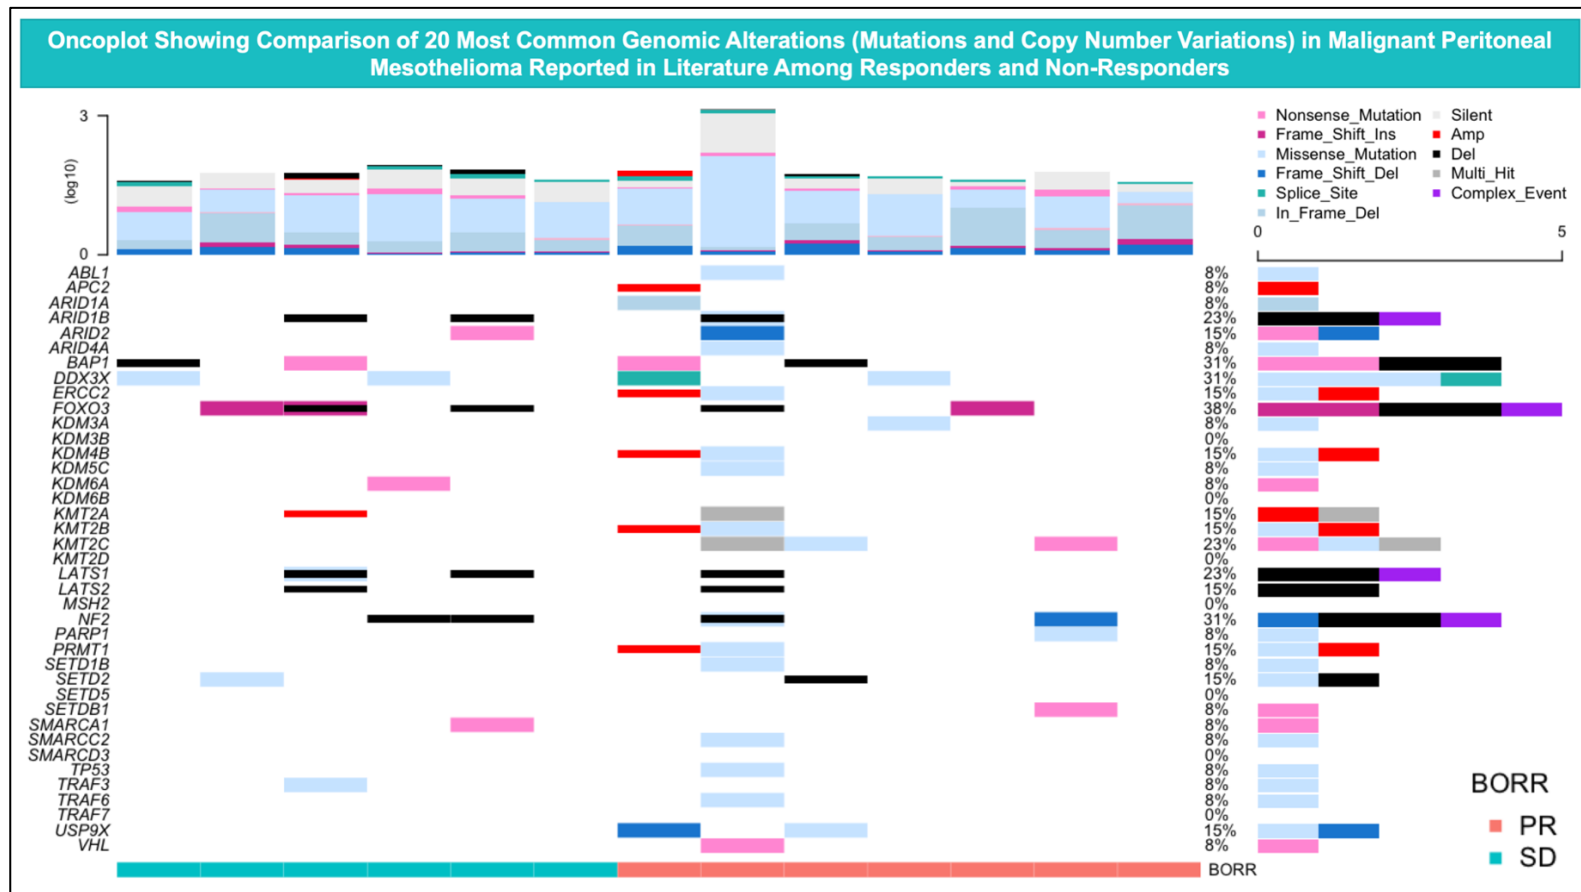



**11. Figure S8. Detailed Gene Signature Scores in Pre-treatment Tumor Tissue Between Responders (Patients with Partial Response [PR]) and Non-responders (Patients with Stable Disease [SD]).**

Gene signatures described in supplemental methods 1 were based on previously published associations with immune-sensitivity, angiogenesis and epithelial-mesenchymal transition (EMT) and have been shown to predict responsiveness to immune checkpoint inhibition and VEGF blockade.(12-14) Scores for each patient-sample were calculated using normalized counts. **Median epithelial and mesenchymal gene scores were different between responders and non-responders, but no apparent difference was seen in immune or angiogenic scores.**

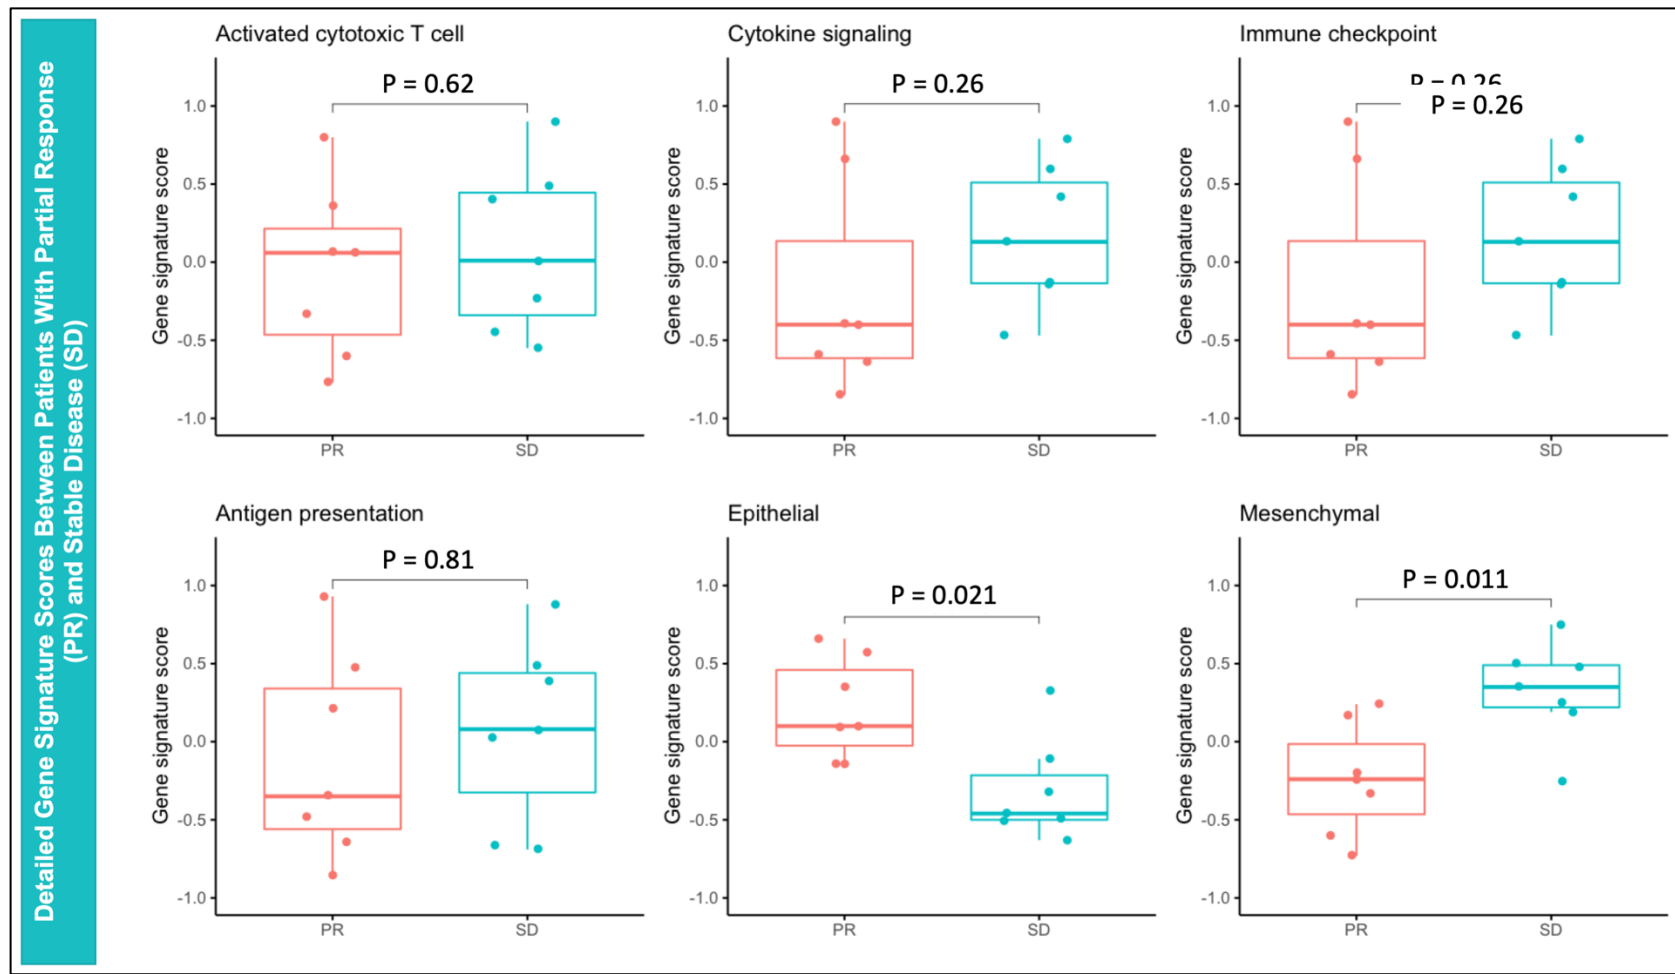

**12. Figure S9. Association between Gene Signature Scores in Pre-treatment Tumor Tissue and Response Status (Responder (Patients with Partial Response [PR]) vs. Non-responders (Patients with Stable Disease [SD])).**

Gene signatures were calculated as previously described. Patients were divided into two groups using median gene signature score of all samples as cutoff. High expression was defined as expression at or above median levels and low expression was defined as expression below the median. Response status was determined as per Response Evaluation Criteria in Solid Tumors - version 1.1. Differences between groups was assessed using Fisher's exact test.

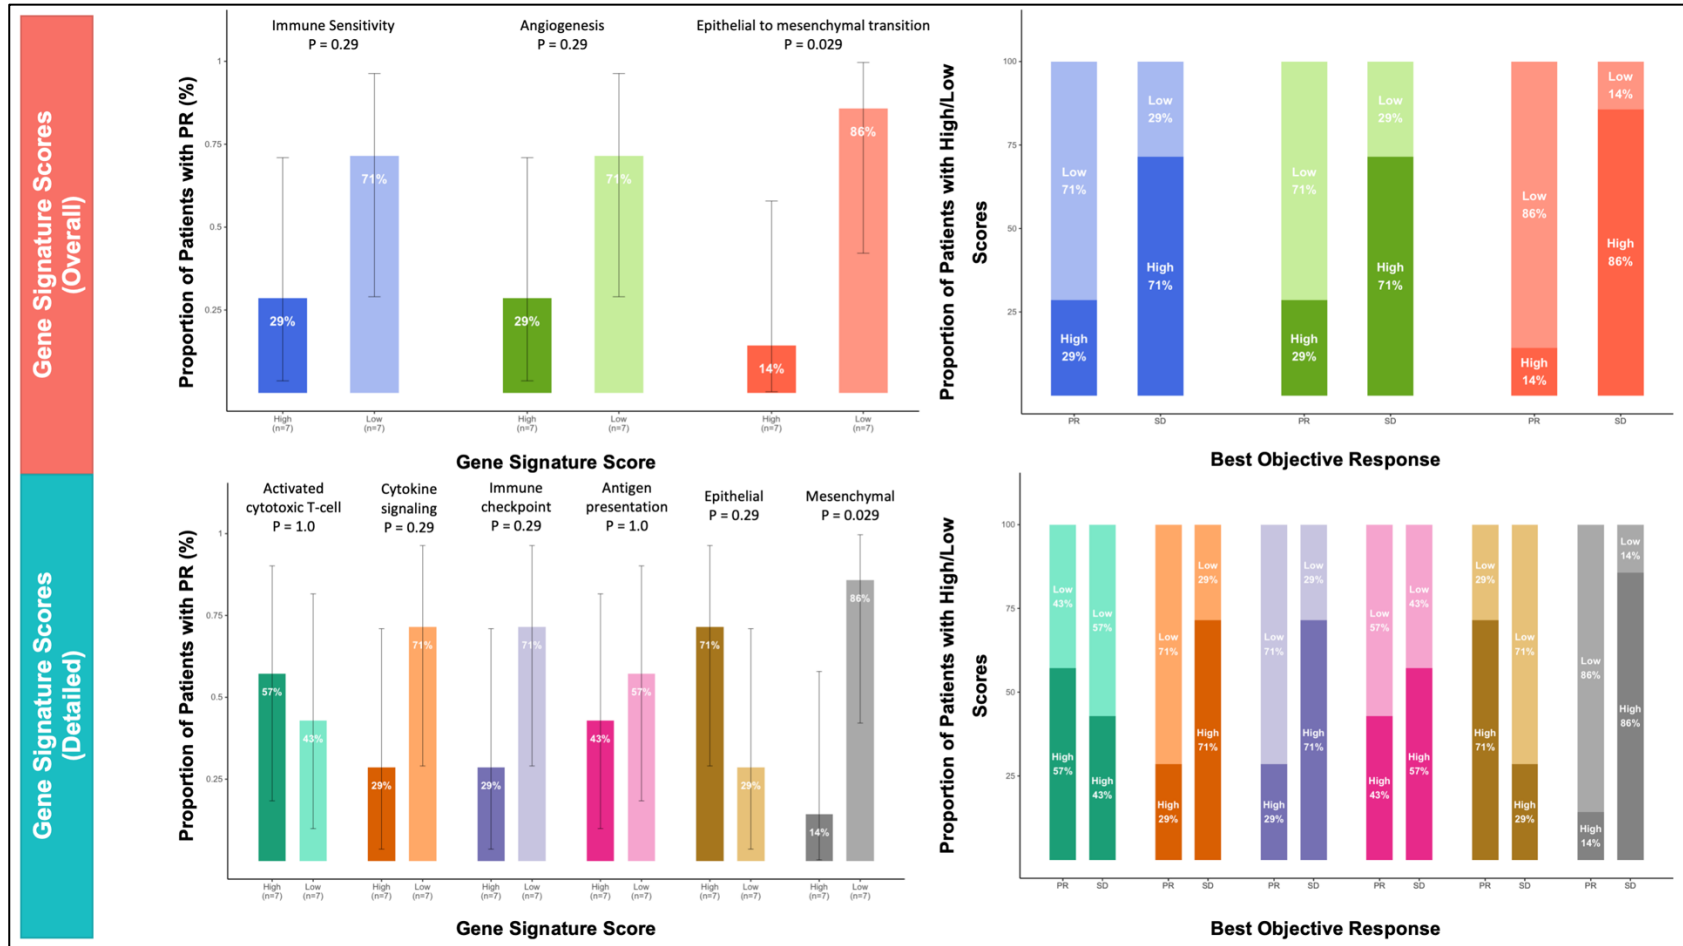

**13. Figure S10. Association between change in gene signature scores between baseline and on-treatment samples and response to therapy with atezolizumab and bevacizumab.**

Gene signatures based on previously published associations with immune-sensitivity, angiogenesis and epithelial-mesenchymal transition (EMT) were calculated for 2 samples (pre-treatment [Pre] and on-treatment [On]) per patient as described in supplemental methods 1.(12-14) Change in gene signature scores was calculated as difference between on-treatment and pre-treatment score. **No significant change in gene signature scores was found between responders (PR) and non-responders (SD).**

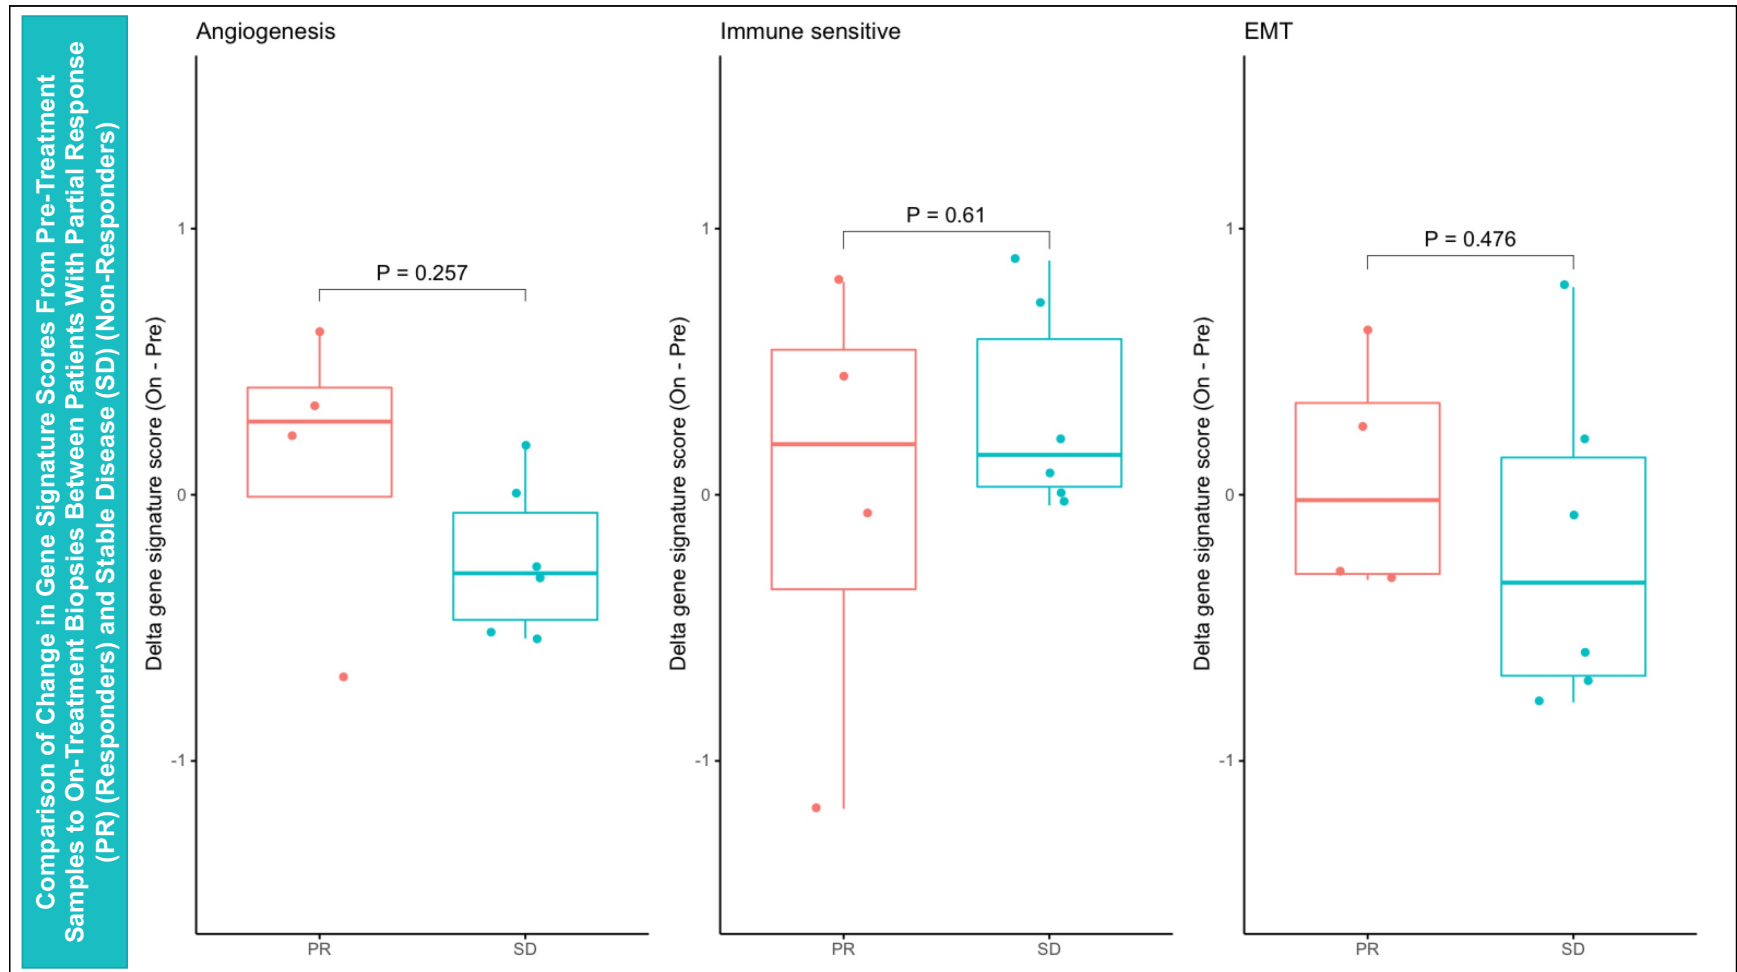

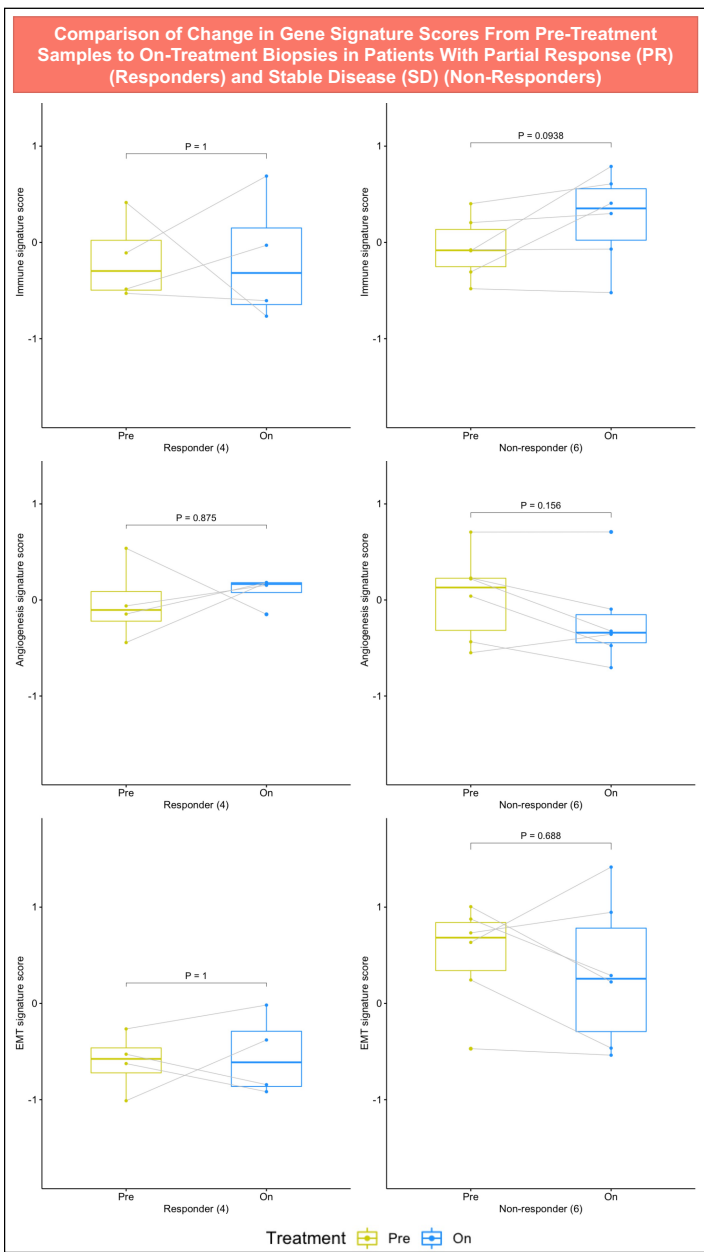

14. Figure S11. Ratio of density of immune-effector cells and immune-suppressor cells its association with response on atezolizumab and bevacizumab on study.

Immune-effector cells were defined as cytotoxic T-cells (CD3+CD8+) and immune-suppressor cells were defined as regulatory T-cells (CD3+FOXP3+) identified by using multiplex immunofluorescence as described in supplementary methods previously. **No significant difference was seen between responders (PR) and non-responders (SD).**

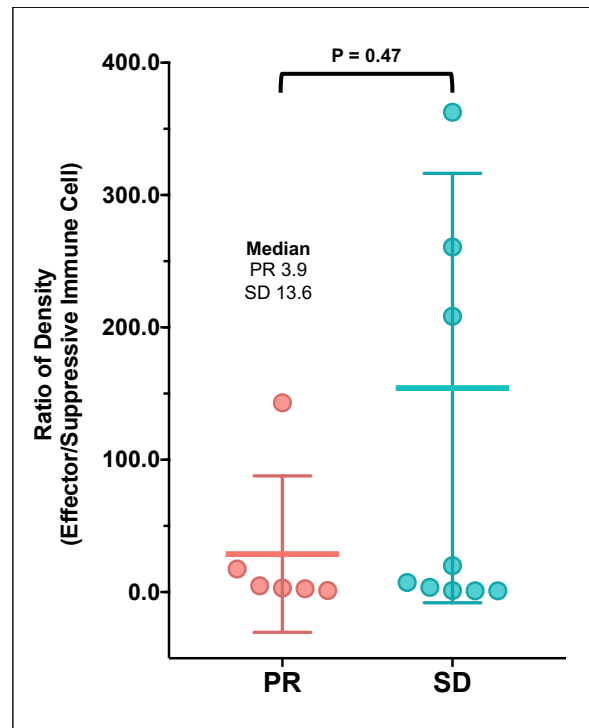

**15. Figure S12. Association between epithelial-mesenchymal transition (EMT) gene score and progression-free survival (PFS) in study cohort.**

Baseline EMT gene signature score was calculated using pre-treatment tissue (prior to treatment with AtezoBev on study) as previously described. Patients were classified as having EMT High (more mesenchymal) and EMT Low (more epithelial) phenotypes. PFS was evaluated for both pre-study platinum-pemetrexed chemotherapy and for on-study atezolizumab and bevacizumab therapy. **EMT high patients appeared to have poorer PFS with both treatments**, although this difference was not statistically significant. These patients possibly represent an aggressive tumor biology.

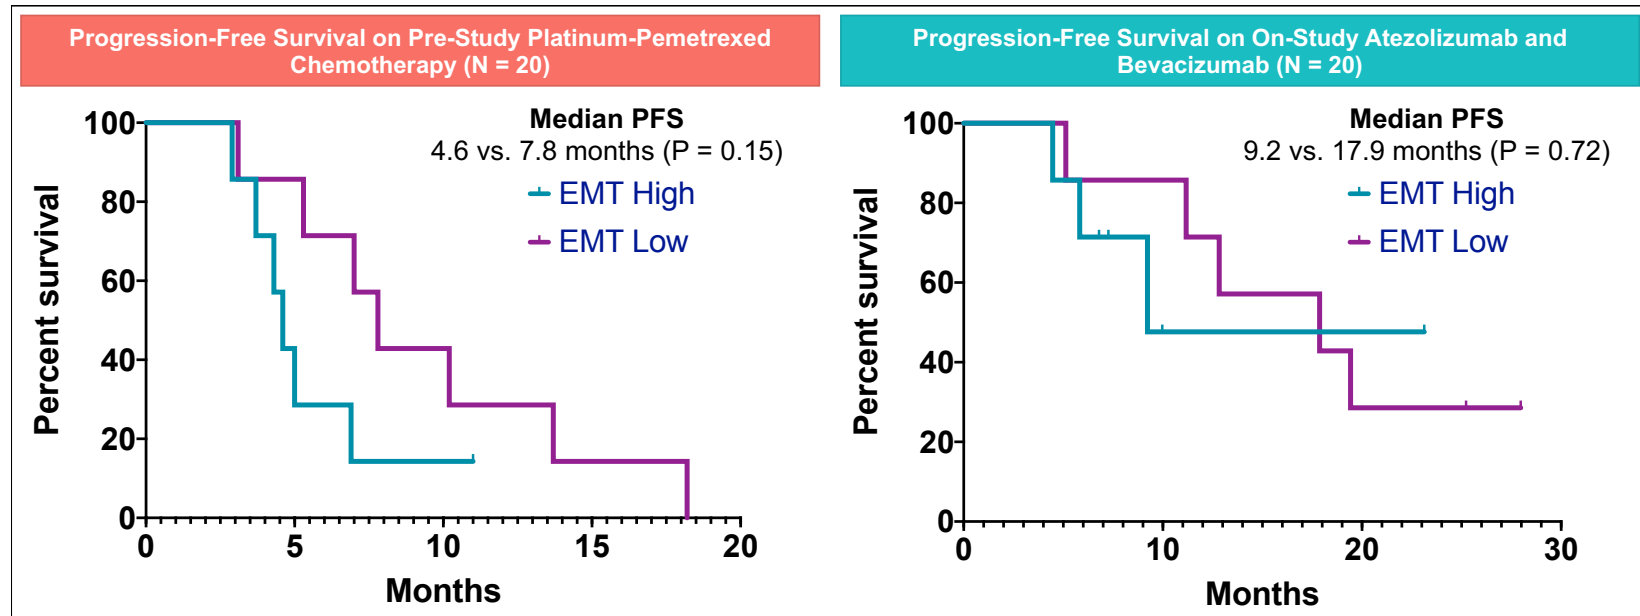

**16. Figure S13. Association between epithelial-mesenchymal transition (EMT) gene signature score used in our study and EMT signature derived from published studies in malignant pleural mesothelioma (MPM) and response. (14,19)**

Using meta-analysis of transcriptomic profiles from published classifications in MPM, Blum et. al. highlighted two main groups of highly correlated clusters within all datasets which corresponded to most extreme epithelioid (E-comp) and sarcomatoid (S-comp) phenotypes. Gene signature score corresponding to genes that correlated with S-comp phenotype and EMT gene signature score using EMT genes in S-comp molecular component was calculated using pre-treatment tissue and correlated with EMT gene signature score calculated using gene set as previously described and with best objective response rate (BORR) classified as responder (partial response, PR) and non-responder (stable disease, SD) as per RECISTv1.1. **EMT gene scores showed strong correlation and although not statistically significant, similar trend (responders had lower EMT gene signature scores indicating a more epithelial phenotype and non-responders had higher EMT gene signature scores indicating a more mesenchymal phenotype) with regards to response.**

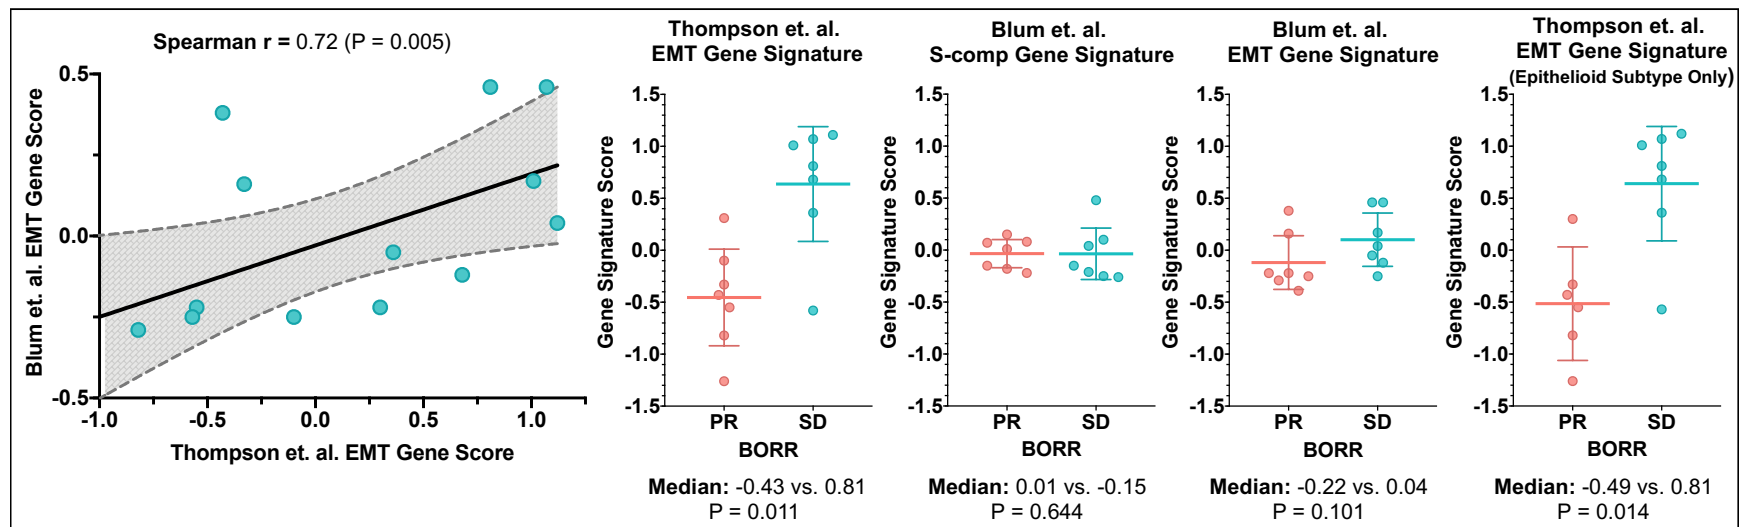

1. Thompson et. al. Gene Set (Lung Cancer, 2020): EMT score =  $Score_{Mesenchymal} - Score_{Epithelial}$  (Mesenchymal genes: *AGER*, *FN1*, *MMP2*, *SNAI2*, *VIM* and *ZEB2*; Epithelial genes: *CDH1*, *CDH3*, *CLDN4*, *EPCAM*, *MAL2* and *ST14*)
2. Blum et. al. EMT Gene Set (Nature communications, 2019): EMT score = Score of genes (EMT genes: *ACVRL1*, *CCND1*, *COL1A1*, *CTNNB1*, *EZH2*, *GDNF*, *GLIPR2*, *HEY1*, *HEYL*, *HIF1A*, *NOG*, *NOTCH1*, *NRP1*, *RBPJ*, *SNAI2*, *SOX9*, *TGFB1*, *TGFB11*, *TWIST1* and *WNT5A*)

**17. Figure S14. Association between response and prognostic transcriptomic profiles published for malignant pleural mesothelioma (MPM).(20)**

Alcala and colleagues reported three distinct transcriptomic profiles with prognostic and therapeutic implications: 1) Hot/IC+/Angio+ profile that is characterized by high expression of pro-angiogenic genes (*VEGFR1*, *VEGFR3*, and *PDGFRB*) and immune-checkpoints (ICs) (*PD(L)1*, *CTLA4*, *TIM3*, and *LAG3*) and short survival; 2) VEGFR2+/VISTA+ profile that has high expression levels of *VEGFR2* and *VISTA* and shows best median survival; and 3) Cold/Angio+ profile with high expression of pro-angiogenic genes (*VEGFR1*, *VEGFR3*, and *PDGFRB*) and show poor survival. We calculated a gene signature score corresponding to each of these profiles and compared these between responders (partial response, PR) and non-responders (stable disease, SD) based on best objective response rate (BORR) per RECISTv1.1. **No clear predictive impact was seen with any of these profiles using this prognostic signature.**

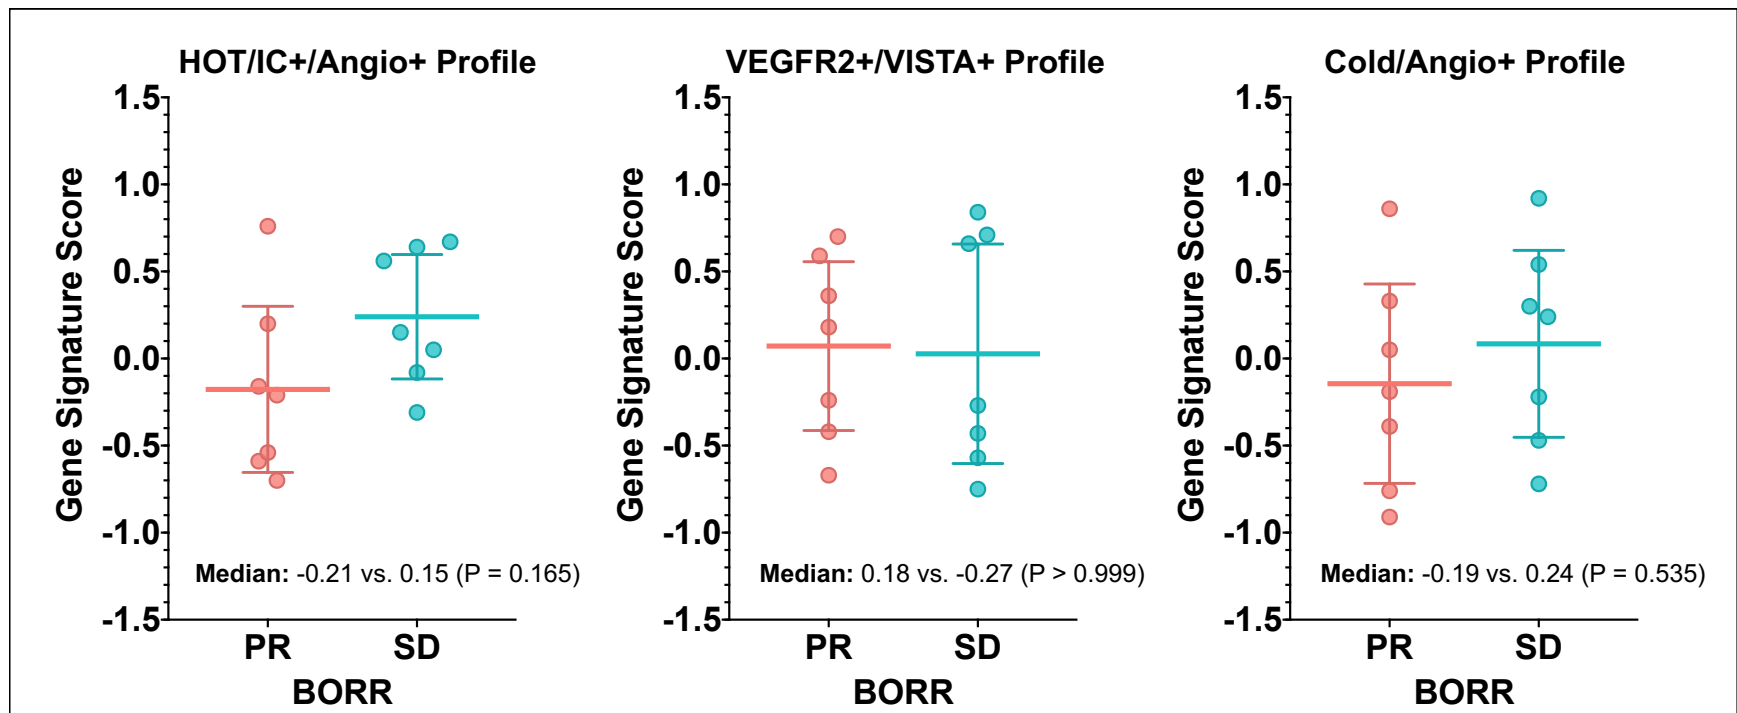



### 18. Table S1. Key trials showcasing activity of immune checkpoint and VEGF inhibition in malignant mesothelioma.

Trials include those that enrolled patients with either malignant pleural (MPM) or peritoneal mesothelioma (MPeM).

| Study                          | Immune Checkpoint Inhibitor | Clinical Trials Identifier | Year | PMID          | Total Evaluable (N) | Was MPeM Patients Eligible / Enrolled | MPeM (N) | RR (%) | RR in MPeM (%) | PFS (m) |
|--------------------------------|-----------------------------|----------------------------|------|---------------|---------------------|---------------------------------------|----------|--------|----------------|---------|
| University of Chicago (21)     | Pembrolizumab               | NCT02399371                | 2018 | OA08.03 (JTO) | 65                  | Yes / Yes                             | 8        | 19.0%  | 12.5%          | 4.5     |
| Keynote 028 (22)               | Pembrolizumab               | NCT02054806                | 2017 | 28291584      | 25                  | No / No                               | -        | 20.0%  | -              | 5.4     |
| JAVELIN (23)                   | Avelumab                    | NCT01772004                | 2019 | 30605211      | 53                  | Yes / No                              | -        | 9.0%   | -              | 4.1     |
| INITIATE (24)                  | Nivolumab + Ipilimumab      | NCT03048474                | 2019 | 30660511      | 34                  | No / No                               | -        | 29.0%  | -              | 6.2     |
| IFCT1501MAPS2 (25)             | Nivolumab                   | NCT02716272                | 2019 | 30660609      | 62                  | No / No                               | -        | 17.5%  | -              | 4.0     |
| IFCT1501MAPS2 (25)             | Nivolumab + Ipilimumab      | NCT02716272                | 2019 | 30660609      | 63                  | No / No                               | -        | 25.8%  | -              | 5.6     |
| University Hospital Siena (26) | Tremelimumab                | NCT01649024                | 2013 | 24035405      | 29                  | Yes / Yes                             | 1        | 7.0%   | NR             | 6.2     |
| PROMISE-meso (27)              | Pembrolizumab               | NCT02991482                | 2020 | 32976938      | 73                  | No / No                               | -        | 22.0%  | -              | 2.5     |
| Study                          | VEGF Inhibitor              | Clinical Trials Identifier | Year | PMID          | Total Evaluable (N) | Was MPeM Patients Eligible / Enrolled | MPeM (N) | RR (%) | RR in MPeM (%) | PFS (m) |
| Jackman et al (28)             | Bevacizumab                 | -                          | 2008 | 18543326      | 24                  | No / No                               | -        | 0.0%   | -              | 2.2     |
| CALGB30307 (29)                | Sorafenib                   | NCT00651456                | 2010 | 20736856      | 30                  | Yes / Yes                             | 3        | 3.3%   | -              | 3.7     |
| CALGB30107 (30)                | Vatalanib                   | NCT00053885                | 2012 | 22197613      | 46                  | Yes / Yes                             | 3        | 6.4%   | -              | 4.1     |

**Abbreviations:** m, months; N, number of patients; NR, not reported; PFS, median progression-free survival; RR, response rate

**19. Table S2. Secondary endpoints per immune-modified Response Evaluation Criteria in Solid Tumors (imRECIST) by independent review.(31)**

| Endpoint                                                                                                | Patients (N) (%)                            |
|---------------------------------------------------------------------------------------------------------|---------------------------------------------|
| Confirmed objective response rate (ORR) – patients with confirmed complete or partial response (N = 20) | 9 of 20 (45%) (95%CI: 23.1 – 68.5)          |
| Disease Control Rate (DCR) – patients with confirmed response or stable disease (N = 20)                | 18 of 20 (90%) (95%CI: 68.3 – 98.8)         |
| Duration of response (DoR) (median) – for all responders (N = 9)                                        | 12.0 months (range: 2.3 – 20.6)             |
| Progression-free survival (PFS) (median) – for all patients (N = 20)                                    | 17.6 months (95%CI: 9.1 – not reached [NR]) |

**Abbreviations:** 95%CI, 95% confidence interval

## 20. Table S3. Treatment-related adverse events (TRAEs)

Listed TRAEs are those of any grade that occurred on study in  $\geq 10\%$  patients and all grade  $\geq 3$  events. All TRAEs are coded and graded as per the Common Terminology Criteria for Adverse Events (CTCAE) Version 4.0.

| Adverse Event                 | All Grades | %  | Grade 1 | %  | Grade 2 | %  | Grade $\geq 3$ | %  |
|-------------------------------|------------|----|---------|----|---------|----|----------------|----|
| Hypertension                  | 12         | 60 |         |    | 6       | 30 | 8              | 40 |
| Fatigue                       | 8          | 40 | 4       | 20 | 2       | 10 | 1              | 5  |
| Anorexia                      | 6          | 30 | 6       | 30 |         |    |                |    |
| Proteinuria                   | 6          | 30 | 5       | 25 | 6       | 30 |                |    |
| Constipation                  | 5          | 25 | 4       | 20 | 1       | 5  |                |    |
| Lymphocyte count decreased    | 5          | 25 | 3       | 15 | 3       | 15 |                |    |
| Nausea                        | 5          | 25 | 4       | 20 | 2       | 10 |                |    |
| Pruritus                      | 5          | 25 | 4       | 20 | 1       | 5  |                |    |
| Arthralgia                    | 4          | 20 | 4       | 20 |         |    |                |    |
| Diarrhea                      | 4          | 20 | 4       | 20 |         |    |                |    |
| Epistaxis                     | 4          | 20 | 4       | 20 |         |    |                |    |
| Vomiting                      | 4          | 20 | 4       | 20 | 1       | 5  |                |    |
| Weight loss                   | 4          | 20 | 3       | 15 | 1       | 5  |                |    |
| Abdominal Pain                | 3          | 15 | 1       | 5  | 1       | 5  | 1              | 5  |
| Creatinine increased          | 3          | 15 | 3       | 15 |         |    |                |    |
| Dry mouth                     | 3          | 15 | 3       | 15 |         |    |                |    |
| Dry skin                      | 3          | 15 | 3       | 15 |         |    |                |    |
| Headache                      | 3          | 15 | 3       | 15 |         |    |                |    |
| Mucositis                     | 3          | 15 | 2       | 10 | 1       | 5  |                |    |
| Myalgia                       | 3          | 15 | 3       | 15 |         |    |                |    |
| Peripheral sensory neuropathy | 3          | 15 | 3       | 15 |         |    |                |    |

|                                      |   |    |   |    |   |    |   |    |
|--------------------------------------|---|----|---|----|---|----|---|----|
| Rash - maculopapular                 | 3 | 15 | 3 | 15 |   |    |   |    |
| Anemia                               | 2 | 10 | 1 | 5  |   |    | 2 | 10 |
| Platelet count decreased             | 2 | 10 | 1 | 5  |   |    | 1 | 5  |
| Aspartate aminotransferase increased | 2 | 10 | 1 | 5  | 1 | 5  |   |    |
| Bruising                             | 2 | 10 | 2 | 10 |   |    |   |    |
| Dehydration                          | 2 | 10 |   |    | 2 | 10 |   |    |
| Dysgeusia                            | 2 | 10 | 2 | 10 |   |    |   |    |
| Dyspnea                              | 2 | 10 | 2 | 10 | 1 | 5  |   |    |
| Eye disorders - Other, specify       | 2 | 10 | 2 | 10 |   |    |   |    |
| Hoarseness                           | 2 | 10 | 2 | 10 |   |    |   |    |
| Hypomagnesemia                       | 2 | 10 | 2 | 10 |   |    |   |    |
| Hypothyroidism                       | 2 | 10 |   |    | 2 | 10 |   |    |
| Alanine aminotransferase increased   | 1 | 5  |   |    |   |    | 1 | 5  |
| Ileus                                | 1 | 5  |   |    |   |    | 1 | 5  |
| Pancreatitis                         | 1 | 5  |   |    |   |    | 1 | 5  |
| Thromboembolic event                 | 1 | 5  |   |    |   |    | 1 | 5  |

21. Table S4. Key trials comparing activity of atezolizumab and bevacizumab (AtezoBev) in current trial to that of available treatment options for patients with malignant (peritoneal) mesothelioma.

| Trial             | Current Study | Involving Immune Checkpoint Inhibitors |               |           |                        |              | Involving Bevacizumab                    |                                         |                            | Involving Chemotherapy    |
|-------------------|---------------|----------------------------------------|---------------|-----------|------------------------|--------------|------------------------------------------|-----------------------------------------|----------------------------|---------------------------|
| Therapy           | AtezoBev      | Avelumab                               | Pembrolizumab | Nivolumab | Nivolumab + Ipilimumab | Tremelimumab | Bevacizumab with Gemcitabine + Cisplatin | Bevacizumab with Cisplatin + Pemetrexed | Bevacizumab with Erlotinib | Gemcitabine + Vinorelbine |
| Arm(s)            | Single        | Single                                 | Single        | Two       | Two                    | vs. Placebo  | vs. Placebo                              | vs. Placebo                             | Single                     | Single                    |
| Disease           | MPeM          | Both                                   | MPM           | MPM       | MPM                    | Both         | Both                                     | MPM                                     | MPM                        | MPM                       |
| Line of Therapy   | >1st          | >1st                                   | >1st          | >1st      | 2/3rd                  | 2/3rd        | >1st                                     | >1st                                    | >1st                       | 2nd                       |
| Level of Evidence | Phase 2       | Phase 1b                               | Phase 1b      | Phase 2   | Phase 2                | Phase 3      | Phase 2R                                 | Phase 3                                 | Phase 2                    | Phase 2                   |
| Total N           | 20            | 53                                     | 25            | 62        | 63                     | 571          | 108                                      | 448                                     | 24                         | 30                        |
| Treated MPeM (N)  | 20            | NRp                                    | 0             | 0         | 0                      | 18           | 9                                        | 0                                       | 0                          | 0                         |
| RR (%)            | 40            | 9                                      | 20            | 18.5      | 25.9                   | 4.5 (1.1)    | 24.5 (22)                                | NRp                                     | 0                          | 10                        |
| 95%CI             | 19-64         | 3-20                                   | 7-41          | 8-28      | 14-38                  | 3-7          | NRp                                      | NRp                                     | 0-16                       | 2-26                      |

|                      |                  |                    |                        |                          |                         |                      |                             |                       |                                |                               |
|----------------------|------------------|--------------------|------------------------|--------------------------|-------------------------|----------------------|-----------------------------|-----------------------|--------------------------------|-------------------------------|
| <b>mPFS (months)</b> | 17.6             | 4.1                | 5.4                    | 4                        | 5.7                     | 2.8 (2.7)            | 6.9 (6)                     | 9.2 (7)               | 2.2                            | 2.8                           |
| <b>95%CI</b>         | 9.1-NR           | 1-6                | 3-7                    | 3-6                      | 3-10                    | 2-3                  | 5-7                         | 9-11                  | 1-6                            | 0.6-12.1                      |
| <b>mOS (months)</b>  | NR               | 10.7               | 18                     | 11.9                     | 15.9                    | 7.7 (7.3)            | 15.6 (15)                   | 18.8 (16)             | 5.8                            | 10.9                          |
| <b>95%CI</b>         | 18-NR            | 7-20               | 9-NR                   | 7-17                     | 11-22                   | 7-9                  | 10-19                       | 16-23                 | 3-10                           | 0.8-25.3                      |
| <b>1-yr OS (%)</b>   | 85               | 44                 | 63                     | 49                       | 58                      | NS                   | 58 (57)                     | NRp                   | NRp                            | 44                            |
| <b>DCR (%)</b>       | 93               | 58                 | 90                     | 40                       | 52                      | 28 (22)              | 51 (60)                     | NRp                   | 50                             | 82                            |
| <b>References</b>    | <b>2016-0861</b> | <b>JAVELIN(23)</b> | <b>KEYNOTE-028(22)</b> | <b>MAPS-2 Trial (25)</b> | <b>MAPS-2 Trial(25)</b> | <b>DETERMINE(32)</b> | <b>Kindler JCO 2012(33)</b> | <b>MAPS Trial(34)</b> | <b>Jackman Cancer 2008(28)</b> | <b>Zucali Cancer 2008(35)</b> |

**Abbreviations:** 95%CI, 95% confidence interval; DCR, disease control rate; MPeM, malignant peritoneal mesothelioma; MPM, malignant pleural mesothelioma; N, number of patients; NR, not reached; NRp, not reported; mOS, median overall survival; mPFS, median progression-free survival; RR, response rate

## 22. References

1. Li H, Durbin R. Fast and accurate short read alignment with Burrows-Wheeler transform. *Bioinformatics* 2009;**25**(14):1754-60 doi 10.1093/bioinformatics/btp324.
2. DePristo MA, Banks E, Poplin R, Garimella KV, Maguire JR, Hartl C, *et al.* A framework for variation discovery and genotyping using next-generation DNA sequencing data. *Nature genetics* 2011;**43**(5):491-8 doi 10.1038/ng.806.
3. Rimmer A, Phan H, Mathieson I, Iqbal Z, Twigg SRF, Consortium WGS, *et al.* Integrating mapping-, assembly- and haplotype-based approaches for calling variants in clinical sequencing applications. *Nature genetics* 2014;**46**(8):912-8 doi 10.1038/ng.3036.
4. Cibulskis K, Lawrence MS, Carter SL, Sivachenko A, Jaffe D, Sougnez C, *et al.* Sensitive detection of somatic point mutations in impure and heterogeneous cancer samples. *Nat Biotechnol* 2013;**31**(3):213-9 doi 10.1038/nbt.2514.
5. Ye K, Schulz MH, Long Q, Apweiler R, Ning Z. Pindel: a pattern growth approach to detect break points of large deletions and medium sized insertions from paired-end short reads. *Bioinformatics* 2009;**25**(21):2865-71 doi 10.1093/bioinformatics/btp394.
6. Dobin A, Davis CA, Schlesinger F, Drenkow J, Zaleski C, Jha S, *et al.* STAR: ultrafast universal RNA-seq aligner. *Bioinformatics* 2013;**29**(1):15-21 doi 10.1093/bioinformatics/bts635.
7. Kim D, Salzberg SL. TopHat-Fusion: an algorithm for discovery of novel fusion transcripts. *Genome Biol* 2011;**12**(8):R72 doi 10.1186/gb-2011-12-8-r72.
8. Trapnell C, Williams BA, Pertea G, Mortazavi A, Kwan G, van Baren MJ, *et al.* Transcript assembly and quantification by RNA-Seq reveals unannotated transcripts and isoform switching during cell differentiation. *Nat Biotechnol* 2010;**28**(5):511-5 doi 10.1038/nbt.1621.
9. Anders S, Pyl PT, Huber W. HTSeq--a Python framework to work with high-throughput sequencing data. *Bioinformatics* 2015;**31**(2):166-9 doi 10.1093/bioinformatics/btu638.

10. Love MI, Huber W, Anders S. Moderated estimation of fold change and dispersion for RNA-seq data with DESeq2. *Genome Biol* 2014;**15**(12):550 doi 10.1186/s13059-014-0550-8.
11. Hanzelmann S, Castelo R, Guinney J. GSEA: gene set variation analysis for microarray and RNA-seq data. *BMC Bioinformatics* 2013;**14**:7 doi 10.1186/1471-2105-14-7.
12. McDermott DF, Huseni MA, Atkins MB, Motzer RJ, Rini BI, Escudier B, *et al.* Clinical activity and molecular correlates of response to atezolizumab alone or in combination with bevacizumab versus sunitinib in renal cell carcinoma. *Nat Med* 2018;**24**(6):749-57 doi 10.1038/s41591-018-0053-3.
13. Franzini A, Baty F, Macovei, II, Durr O, Droege C, Betticher D, *et al.* Gene Expression Signatures Predictive of Bevacizumab/Erlotinib Therapeutic Benefit in Advanced Nonsquamous Non-Small Cell Lung Cancer Patients (SAKK 19/05 trial). *Clin Cancer Res* 2015;**21**(23):5253-63 doi 10.1158/1078-0432.CCR-14-3135.
14. Thompson JC, Hwang WT, Davis C, Deshpande C, Jeffries S, Rajpurohit Y, *et al.* Gene signatures of tumor inflammation and epithelial-to-mesenchymal transition (EMT) predict responses to immune checkpoint blockade in lung cancer with high accuracy. *Lung cancer* 2020;**139**:1-8 doi 10.1016/j.lungcan.2019.10.012.
15. Zalcman G, Mazieres J, Margery J, Greillier L, Audigier-Valette C, Moro-Sibilot D, *et al.* Bevacizumab for newly diagnosed pleural mesothelioma in the Mesothelioma Avastin Cisplatin Pemetrexed Study (MAPS): a randomised, controlled, open-label, phase 3 trial. *Lancet* 2016;**387**(10026):1405-14 doi 10.1016/S0140-6736(15)01238-6.
16. Hazarika M, White RM, Johnson JR, Pazdur R. FDA drug approval summaries: pemetrexed (Alimta). *Oncologist* 2004;**9**(5):482-8 doi 10.1634/theoncologist.9-5-482.
17. Agresti A, Coull BA. Approximate is Better than “Exact” for Interval Estimation of Binomial Proportions. *The American Statistician* 1998;**52**(2):119-26 doi 10.1080/00031305.1998.10480550.



18. Janne PA, Wozniak AJ, Belani CP, Keohan ML, Ross HJ, Polikoff JA, *et al.* Open-label study of pemetrexed alone or in combination with cisplatin for the treatment of patients with peritoneal mesothelioma: outcomes of an expanded access program. *Clinical lung cancer* 2005;**7**(1):40-6 doi 10.3816/CLC.2005.n.020.
19. Blum Y, Meiller C, Quetel L, Elarouci N, Ayadi M, Tashtanbaeva D, *et al.* Dissecting heterogeneity in malignant pleural mesothelioma through histo-molecular gradients for clinical applications. *Nat Commun* 2019;**10**(1):1333 doi 10.1038/s41467-019-09307-6.
20. Alcala N, Mangiante L, Le-Stang N, Gustafson CE, Boyault S, Damiola F, *et al.* Redefining malignant pleural mesothelioma types as a continuum uncovers immune-vascular interactions. *EBioMedicine* 2019;**48**:191-202 doi 10.1016/j.ebiom.2019.09.003.
21. Desai A, Karrison T, Rose B, Tan Y, Hill B, Pemberton E, *et al.* OA08.03 Phase II Trial of Pembrolizumab (NCT02399371) In Previously-Treated Malignant Mesothelioma (MM): Final Analysis. *Journal of Thoracic Oncology* 2018;**13**(10):S339 doi 10.1016/j.jtho.2018.08.277.
22. Alley EW, Lopez J, Santoro A, Morosky A, Saraf S, Piperdi B, *et al.* Clinical safety and activity of pembrolizumab in patients with malignant pleural mesothelioma (KEYNOTE-028): preliminary results from a non-randomised, open-label, phase 1b trial. *The Lancet Oncology* 2017;**18**(5):623-30 doi 10.1016/S1470-2045(17)30169-9.
23. Hassan R, Thomas A, Nemunaitis JJ, Patel MR, Bennouna J, Chen FL, *et al.* Efficacy and Safety of Avelumab Treatment in Patients With Advanced Unresectable Mesothelioma: Phase 1b Results From the JAVELIN Solid Tumor Trial. *JAMA Oncol* 2019;**5**(3):351-7 doi 10.1001/jamaoncol.2018.5428.
24. Disselhorst MJ, Quispel-Janssen J, Lalezari F, Monkhorst K, de Vries JF, van der Noort V, *et al.* Ipilimumab and nivolumab in the treatment of recurrent malignant pleural mesothelioma (INITIATE): results of a prospective, single-arm, phase 2 trial. *Lancet Respir Med* 2019;**7**(3):260-70 doi 10.1016/S2213-2600(18)30420-X.

25. Scherpereel A, Mazieres J, Greillier L, Lantuejoul S, Do P, Bylicki O, *et al.* Nivolumab or nivolumab plus ipilimumab in patients with relapsed malignant pleural mesothelioma (IFCT-1501 MAPS2): a multicentre, open-label, randomised, non-comparative, phase 2 trial. *The Lancet Oncology* 2019;**20**(2):239-53 doi 10.1016/S1470-2045(18)30765-4.
26. Calabro L, Morra A, Fonsatti E, Cutaia O, Amato G, Giannarelli D, *et al.* Tremelimumab for patients with chemotherapy-resistant advanced malignant mesothelioma: an open-label, single-arm, phase 2 trial. *The Lancet Oncology* 2013;**14**(11):1104-11 doi 10.1016/S1470-2045(13)70381-4.
27. Popat S, Curioni-Fontecedro A, Dafni U, Shah R, O'Brien M, Pope A, *et al.* A multicentre randomised phase III trial comparing pembrolizumab versus single-agent chemotherapy for advanced pre-treated malignant pleural mesothelioma: the European Thoracic Oncology Platform (ETOP 9-15) PROMISE-meso trial. *Ann Oncol* 2020;**31**(12):1734-45 doi 10.1016/j.annonc.2020.09.009.
28. Jackman DM, Kindler HL, Yeap BY, Fidias P, Salgia R, Lucca J, *et al.* Erlotinib plus bevacizumab in previously treated patients with malignant pleural mesothelioma. *Cancer* 2008;**113**(4):808-14 doi 10.1002/cncr.23617.
29. Dubey S, Janne PA, Krug L, Pang H, Wang X, Heinze R, *et al.* A phase II study of sorafenib in malignant mesothelioma: results of Cancer and Leukemia Group B 30307. *J Thorac Oncol* 2010;**5**(10):1655-61 doi 10.1097/JTO.0b013e3181ec18db.
30. Jahan T, Gu L, Kratzke R, Dudek A, Otterson GA, Wang X, *et al.* Vatalanib in malignant mesothelioma: a phase II trial by the Cancer and Leukemia Group B (CALGB 30107). *Lung Cancer* 2012;**76**(3):393-6 doi 10.1016/j.lungcan.2011.11.014.
31. Hodi FS, Ballinger M, Lyons B, Soria JC, Nishino M, Tabernero J, *et al.* Immune-Modified Response Evaluation Criteria In Solid Tumors (imRECIST): Refining Guidelines to Assess the Clinical Benefit of Cancer Immunotherapy. *Journal of clinical oncology : official journal of the American Society of Clinical Oncology* 2018;**36**(9):850-8 doi 10.1200/JCO.2017.75.1644.
32. Maio M, Scherpereel A, Calabro L, Aerts J, Perez SC, Bearz A, *et al.* Tremelimumab as second-line or third-line treatment in relapsed malignant mesothelioma (DETERMINE): a multicentre, international, randomised, double-blind, placebo-controlled phase 2b trial. *The Lancet Oncology* 2017;**18**(9):1261-73 doi 10.1016/S1470-2045(17)30446-1.

33. Kindler HL, Karrison TG, Gandara DR, Lu C, Krug LM, Stevenson JP, *et al.* Multicenter, double-blind, placebo-controlled, randomized phase II trial of gemcitabine/cisplatin plus bevacizumab or placebo in patients with malignant mesothelioma. *Journal of clinical oncology : official journal of the American Society of Clinical Oncology* 2012;**30**(20):2509-15 doi 10.1200/JCO.2011.41.5869.
34. Zalcman G, Mazieres J, Margery J, Greillier L, Audigier-Valette C, Moro-Sibilot D, *et al.* Bevacizumab for newly diagnosed pleural mesothelioma in the Mesothelioma Avastin Cisplatin Pemetrexed Study (MAPS): a randomised, controlled, open-label, phase 3 trial. *Lancet* 2016;**387**(10026):1405-14 doi 10.1016/S0140-6736(15)01238-6.
35. Zucali PA, Ceresoli GL, Garassino I, De Vincenzo F, Cavina R, Campagnoli E, *et al.* Gemcitabine and vinorelbine in pemetrexed-pretreated patients with malignant pleural mesothelioma. *Cancer* 2008;**112**(7):1555-61 doi 10.1002/cncr.23337.
